# Supplementary material for: DFT exploration of [3 + 2] cycloaddition reaction of 1H-phosphorinium-3-olate and 1-methylphosphorinium-3-olate with methyl methacrylate
Source: Royal Society of Chemistry journal article supplement (doi:10.1039/c8ra04703k), 2018-01-01
Supplement: c8ra04703k1.pdf [file c8ra04703k1.pdf]

## Supplementary Material

### DFT Exploration of [3+2] Cycloaddition Reaction of 1*H*-Phosphorinium-3-olate and 1-Methylphosphorinium-3-olate with Methyl Methacrylate

Dhanashree Hallooman<sup>a</sup>, Mar Ríos-Gutiérrez<sup>b</sup>, Lydia Rhyman<sup>a,c</sup>, Ibrahim A. Alswaidan<sup>d</sup>, Luis R. Domingo<sup>b\*</sup> and Ponnadurai Ramasami<sup>a,c\*</sup>

<sup>a</sup>*Computational Chemistry Group, Department of Chemistry, Faculty of Science, University of Mauritius, Réduit 80837, Mauritius*

<sup>b</sup>*Department of Organic Chemistry, University of Valencia, Dr. Moliner 50, E-46100 Burjassot, Valencia, Spain*

<sup>c</sup>*Department of Applied Chemistry, University of Johannesburg, Doornfontein, Johannesburg 2028, South Africa*

<sup>d</sup>*Department of Pharmaceutical Chemistry, College of Pharmacy, King Saud University, Riyadh 11451, Saudi Arabia*

\*Author for correspondence email: [p.ramasami@uom.ac.mu](mailto:p.ramasami@uom.ac.mu); [domingo@utopia.uv.es](mailto:domingo@utopia.uv.es)

### Table of contents

|           |                  |                                                                                                                                                                                                                                                                                                                                 |
|-----------|------------------|---------------------------------------------------------------------------------------------------------------------------------------------------------------------------------------------------------------------------------------------------------------------------------------------------------------------------------|
| <b>S3</b> | <b>Table S1:</b> | Relative electronic energies <sup>a</sup> ( $\Delta E$ , in kcal·mol <sup>-1</sup> ) computed using various methods in the gas phase for the most favorable TS and CA involved in the 32CA.                                                                                                                                     |
| <b>S4</b> | <b>Table S2:</b> | Total electronic energies (E, in a.u.) and relative electronic energies <sup>a</sup> including ZPE ( $\Delta E$ , in kcal mol <sup>-1</sup> ) computed at the B3LYP/6-31G(d) computational level, in the gas phase and solvents for the TSs and CAs involved in the 32CA reactions of <b>1a</b> and <b>1b</b> with <b>MMA</b> . |
| <b>S5</b> | <b>Table S3:</b> | Wiberg bond order of the TSs involved in the 32CA reactions of <b>1a</b> and <b>1b</b> with <b>MA</b> .                                                                                                                                                                                                                         |
| <b>S6</b> | <b>Table S4:</b> | Dipole moment and global electron density transfer of the TSs involved in the 32CA reactions of <b>1a</b> and <b>1b</b> with <b>MA</b> .                                                                                                                                                                                        |
| <b>S7</b> | -                | Cartesian coordinates of the B3LYP/6-31G(d) optimised geometries associated with the stationary points for 32CA reaction of <b>1a</b> and <b>1b</b> with <b>MMA</b> .                                                                                                                                                           |

**Table S1:** Relative electronic energies<sup>a</sup> ( $\Delta E$ , in kcal·mol<sup>-1</sup>) computed using various methods in the gas phase for the most favorable TS and CA involved in the 32CA.

| Gas phase     |                                       |                                             |                                                 |
|---------------|---------------------------------------|---------------------------------------------|-------------------------------------------------|
|               | B3LYP/6-31G(d)                        | B3LYP/6-311G(d,p)                           | B3LYP/6-311++G(d,p)                             |
| <b>TS6x-H</b> | 8.4                                   | 10.8                                        | 12.6                                            |
| <b>CA6x-H</b> | -42.4                                 | -37.7                                       | -34.9                                           |
|               | M06-2X/6-31G(d)                       | M06-2X/6-311G(d,p)                          | M06-2X/6-311++G(d,p)                            |
| <b>TS6x-H</b> | 2.8                                   | 3.9                                         | 5.3                                             |
| <b>CA6x-H</b> | -61.8                                 | -58.3                                       | -55.7                                           |
|               | MPWB1K/6-31G(d)                       | MPWB1K/6-311G(d,p)                          | MPWB1K/6-311++G(d,p)                            |
| <b>TS6x-H</b> | 6.1                                   | 7.4                                         | 8.6                                             |
| <b>CA6x-H</b> | -61.4                                 | -58.3                                       | -56.0                                           |
|               | B3LYP-G3/6-31G(d)//<br>B3LYP/6-31G(d) | B3LYP-G3/6-311G(d,p)//<br>B3LYP/6-311G(d,p) | B3LYP-G3/6-311++G(d,p)//<br>B3LYP/6-311++G(d,p) |
| <b>TS6x-H</b> | -2.6                                  | -0.3                                        | 1.3                                             |
| <b>CA6x-H</b> | -56.8                                 | -52.1                                       | -49.4                                           |

**Table S2:** Total electronic energies (E, in a.u.) and relative electronic energies<sup>a</sup> including ZPE ( $\Delta E$ , in kcal mol<sup>-1</sup>) computed at the B3LYP/6-31G(d) computational level, in the gas phase and solvents for the TSs and CAs involved in the 32CA reactions of **1a** and **1b** with **MMA**.

|                | Gas phase   |            | THF         |            | EtOH        |            |
|----------------|-------------|------------|-------------|------------|-------------|------------|
|                | E           | $\Delta E$ | E           | $\Delta E$ | E           | $\Delta E$ |
| <b>1a</b>      | -609.948959 | -          | -609.962117 | -          | -609.964723 | -          |
| <b>1b</b>      | -649.250043 | -          | -649.265294 | -          | -649.268134 | -          |
| <b>MMA</b>     | -345.667602 | -          | -345.671750 | -          | -345.672521 | -          |
| <b>TS6n-H</b>  | -955.597419 | 12.0       | -955.610746 | 14.5       | -955.613526 | 14.9       |
| <b>TS6x-H</b>  | -955.603209 | 8.4        | -955.614090 | 12.4       | -955.616111 | 13.3       |
| <b>TS7n-H</b>  | -955.593764 | 14.3       | -955.606072 | 17.4       | -955.608768 | 17.9       |
| <b>TS7x-H</b>  | -955.599628 | 10.6       | -955.611168 | 14.2       | -955.613456 | 14.9       |
| <b>CA6n-H</b>  | -955.684248 | -42.5      | -955.693524 | -37.4      | -955.695270 | -36.4      |
| <b>CA6x-H</b>  | -955.684425 | -42.6      | -955.693399 | -37.4      | -955.695016 | -36.3      |
| <b>CA7n-H</b>  | -955.683305 | -41.9      | -955.692256 | -36.6      | -955.693972 | -35.6      |
| <b>CA7x-H</b>  | -955.683988 | -42.3      | -955.692665 | -36.9      | -955.694252 | -35.8      |
| <b>TS6n-Me</b> | -994.892140 | 16.0       | -994.906373 | 19.6       | -994.909374 | 19.2       |
| <b>TS6x-Me</b> | -994.899186 | 11.6       | -994.910130 | 17.9       | -994.912170 | 16.9       |
| <b>TS7n-Me</b> | -994.887568 | 18.9       | -994.900876 | 23.2       | -994.903674 | 22.7       |
| <b>TS7x-Me</b> | -994.894184 | 14.7       | -994.906267 | 20.0       | -994.908820 | 19.3       |
| <b>CA6n-Me</b> | -994.972159 | -34.2      | -994.982374 | -27.4      | -994.984322 | -28.4      |
| <b>CA6x-Me</b> | -994.974533 | -35.7      | -994.984058 | -28.3      | -994.985824 | -29.5      |
| <b>CA7n-Me</b> | -994.971539 | -33.8      | -994.981733 | -27.0      | -994.983649 | -28.0      |
| <b>CA7x-Me</b> | -994.974338 | -35.6      | -994.983654 | -28.1      | -994.985391 | -29.2      |

<sup>a</sup> Relative to **1a** + **MMA** or **1b** + **MMA**.

**Table S3:** Wiberg bond order of the TSs involved in the 32CA reactions of **1a** and **1b** with **MA**.

| Wiberg Bond Order |           |       |       |       |       |       |
|-------------------|-----------|-------|-------|-------|-------|-------|
|                   | Gas phase |       | THF   |       | EtOH  |       |
|                   | C3–C4     | C1–C5 | C3–C4 | C1–C5 | C3–C4 | C1–C5 |
| <b>TS6n-H</b>     | 0.14      | 0.33  | 0.14  | 0.35  | 0.14  | 0.05  |
| <b>TS6x-H</b>     | 0.15      | 0.33  | 0.15  | 0.35  | 0.15  | 0.35  |
| <b>TS6n-Me</b>    | 0.14      | 0.37  | 0.14  | 0.41  | 0.14  | 0.41  |
| <b>TS6x-Me</b>    | 0.16      | 0.40  | 0.16  | 0.42  | 0.15  | 0.43  |
|                   | C1–C4     | C3–C5 | C1–C4 | C3–C5 | C1–C4 | C3–C5 |
| <b>TS7n-H</b>     | 0.22      | 0.30  | 0.21  | 0.32  | 0.21  | 0.33  |
| <b>TS7x-H</b>     | 0.19      | 0.31  | 0.19  | 0.33  | 0.19  | 0.33  |
| <b>TS7n-Me</b>    | 0.22      | 0.34  | 0.21  | 0.37  | 0.21  | 0.37  |
| <b>TS7x-Me</b>    | 0.20      | 0.37  | 0.19  | 0.40  | 0.18  | 0.41  |

**Table S4:** Dipole moment and global electron density transfer of the TSs involved in the 32CA reactions of **1a** and **1b** with **MA**.

|                | Gas phase   |                             | THF         |                             | EtOH        |                             |
|----------------|-------------|-----------------------------|-------------|-----------------------------|-------------|-----------------------------|
|                | GEDT<br>(e) | Dipole<br>Moment<br>(debye) | GEDT<br>(e) | Dipole<br>Moment<br>(debye) | GEDT<br>(e) | Dipole<br>Moment<br>(debye) |
| <b>TS6n-H</b>  | 0.04        | 5.774                       | 0.05        | 7.841                       | 0.05        | 8.334                       |
| <b>TS6x-H</b>  | 0.05        | 4.598                       | 0.05        | 5.913                       | 0.05        | 6.182                       |
| <b>TS6n-Me</b> | 0.08        | 6.536                       | 0.09        | 8.837                       | 0.09        | 9.366                       |
| <b>TS6x-Me</b> | 0.08        | 4.635                       | 0.09        | 5.997                       | 0.09        | 6.269                       |
| <b>TS7n-H</b>  | 0.01        | 4.832                       | 0.02        | 6.938                       | 0.03        | 7.453                       |
| <b>TS7x-H</b>  | 0.04        | 3.712                       | 0.04        | 5.152                       | 0.04        | 5.484                       |
| <b>TS7n-Me</b> | 0.04        | 5.790                       | 0.06        | 8.126                       | 0.06        | 8.662                       |
| <b>TS7x-Me</b> | 0.08        | 4.281                       | 0.09        | 6.023                       | 0.09        | 6.446                       |

Cartesian coordinates of the B3LYP/6-31G(d) optimised geometries associated with the stationary points for 32CA reaction of **1a** and **1b** with **MMA**.

**Gas Phase:**

**1a:**

|    |              |              |              |
|----|--------------|--------------|--------------|
| 6  | -0.378605000 | -1.217955000 | 0.000000000  |
| 6  | -1.344474000 | -0.106020000 | -0.000001000 |
| 6  | -0.787032000 | 1.253649000  | 0.000000000  |
| 6  | 0.537272000  | 1.630291000  | 0.000000000  |
| 6  | 1.664194000  | 0.762563000  | 0.000000000  |
| 1  | 2.250847000  | -1.867386000 | 0.000001000  |
| 1  | -0.750483000 | -2.235674000 | 0.000001000  |
| 1  | -1.543987000 | 2.032846000  | 0.000000000  |
| 1  | 0.755748000  | 2.696721000  | 0.000001000  |
| 1  | 2.684367000  | 1.121754000  | 0.000000000  |
| 8  | -2.561836000 | -0.322093000 | 0.000000000  |
| 15 | 1.263338000  | -0.873779000 | 0.000000000  |

**1b:**

|   |              |              |              |
|---|--------------|--------------|--------------|
| 6 | -0.223420000 | -1.140756000 | -0.017906000 |
| 6 | -1.579577000 | -0.570663000 | 0.004611000  |
| 6 | -1.678308000 | 0.894546000  | 0.021017000  |

|    |              |              |              |
|----|--------------|--------------|--------------|
| 6  | -0.649891000 | 1.808921000  | 0.019563000  |
| 6  | 0.741745000  | 1.515162000  | 0.006781000  |
| 1  | -0.119623000 | -2.219927000 | -0.037977000 |
| 1  | -2.699850000 | 1.263952000  | 0.038633000  |
| 1  | -0.917025000 | 2.864495000  | 0.031301000  |
| 1  | 1.498571000  | 2.288891000  | -0.004260000 |
| 8  | -2.579024000 | -1.300804000 | 0.025263000  |
| 15 | 1.113284000  | -0.127422000 | -0.083900000 |
| 6  | 2.829529000  | -0.729012000 | 0.083318000  |
| 1  | 3.510365000  | 0.010078000  | -0.347310000 |
| 1  | 3.083543000  | -0.889193000 | 1.134426000  |
| 1  | 2.936489000  | -1.669722000 | -0.462720000 |

**MMA:**

|   |              |              |              |
|---|--------------|--------------|--------------|
| 6 | -1.363296000 | 1.580528000  | 0.000035000  |
| 1 | -0.546782000 | 2.293607000  | 0.000141000  |
| 1 | -2.373963000 | 1.980423000  | 0.000102000  |
| 6 | -1.144836000 | 0.259535000  | -0.000012000 |
| 6 | 0.241517000  | -0.299144000 | 0.000018000  |
| 8 | 0.484179000  | -1.491011000 | 0.000081000  |
| 8 | 1.207341000  | 0.649071000  | -0.000058000 |



|   |              |              |              |
|---|--------------|--------------|--------------|
| 6 | 2.552255000  | 0.149509000  | -0.000013000 |
| 1 | 2.737894000  | -0.458384000 | -0.889789000 |
| 1 | 3.192081000  | 1.032677000  | 0.001193000  |
| 1 | 2.737146000  | -0.460376000 | 0.888537000  |
| 6 | -2.240301000 | -0.773947000 | -0.000051000 |
| 1 | -2.162821000 | -1.426362000 | -0.877098000 |
| 1 | -2.162618000 | -1.426657000 | 0.876750000  |
| 1 | -3.225123000 | -0.298280000 | 0.000123000  |

**TS6n-H:** (Imaginary frequency =  $342.10i$  cm<sup>-1</sup>)

|   |              |              |              |
|---|--------------|--------------|--------------|
| 6 | -0.590705000 | -0.718920000 | 1.752043000  |
| 6 | -1.134787000 | -1.582815000 | 0.812288000  |
| 6 | -1.888875000 | -1.208318000 | -0.383638000 |
| 1 | -1.609434000 | 2.602112000  | 0.331611000  |
| 1 | -0.974327000 | -2.650752000 | 0.923491000  |
| 6 | -2.044430000 | 0.248834000  | -0.633036000 |
| 1 | -2.741617000 | 0.476444000  | -1.437588000 |
| 6 | -0.738402000 | 0.675960000  | 1.742381000  |
| 1 | -0.292376000 | 1.275731000  | 2.529940000  |
| 6 | -0.201690000 | 0.598197000  | -1.746826000 |
| 1 | -0.661846000 | 1.406411000  | -2.308903000 |

|    |              |              |              |
|----|--------------|--------------|--------------|
| 6  | 0.886963000  | 0.893806000  | -0.945878000 |
| 8  | -2.283746000 | -2.042686000 | -1.204566000 |
| 1  | 0.024158000  | -1.158372000 | 2.536200000  |
| 6  | 1.686902000  | -0.241092000 | -0.462713000 |
| 8  | 1.403329000  | -1.418416000 | -0.628937000 |
| 8  | 2.809085000  | 0.156703000  | 0.198638000  |
| 6  | 3.644056000  | -0.907276000 | 0.670614000  |
| 1  | 4.506823000  | -0.422649000 | 1.129925000  |
| 1  | 3.113792000  | -1.519868000 | 1.405917000  |
| 1  | 3.959141000  | -1.549723000 | -0.156339000 |
| 1  | -0.296731000 | -0.397452000 | -2.168901000 |
| 15 | -2.041086000 | 1.328511000  | 0.768957000  |
| 6  | 1.340428000  | 2.308212000  | -0.692465000 |
| 1  | 2.163272000  | 2.580717000  | -1.368932000 |
| 1  | 0.525839000  | 3.017968000  | -0.873607000 |
| 1  | 1.713513000  | 2.447440000  | 0.325140000  |

**TS6x-H:** (Imaginary frequency =  $336.93i$  cm<sup>-1</sup>)

|   |             |              |              |
|---|-------------|--------------|--------------|
| 6 | 1.321739000 | -0.463485000 | 1.908573000  |
| 6 | 2.308642000 | 0.293140000  | 1.292118000  |
| 6 | 2.573394000 | 0.374186000  | -0.142060000 |

|    |              |              |              |
|----|--------------|--------------|--------------|
| 1  | -0.305510000 | -2.058956000 | -1.060731000 |
| 1  | 2.946054000  | 0.926897000  | 1.903250000  |
| 6  | 1.702955000  | -0.449170000 | -1.023068000 |
| 1  | 2.063487000  | -0.517948000 | -2.047694000 |
| 6  | 0.464034000  | -1.361536000 | 1.253360000  |
| 1  | -0.270448000 | -1.924057000 | 1.821316000  |
| 6  | 0.140146000  | 0.982179000  | -1.457814000 |
| 1  | -0.172702000 | 0.416596000  | -2.328748000 |
| 6  | -0.762076000 | 1.122250000  | -0.417941000 |
| 8  | 3.400851000  | 1.160161000  | -0.621300000 |
| 1  | 1.193781000  | -0.335409000 | 2.982830000  |
| 6  | -1.940073000 | 0.240129000  | -0.453495000 |
| 8  | -2.097248000 | -0.682614000 | -1.248356000 |
| 8  | -2.870662000 | 0.551534000  | 0.483035000  |
| 6  | -4.045502000 | -0.269137000 | 0.477507000  |
| 1  | -4.543927000 | -0.225150000 | -0.494610000 |
| 1  | -3.792135000 | -1.310909000 | 0.695298000  |
| 1  | -4.690076000 | 0.137379000  | 1.257833000  |
| 1  | 0.899628000  | 1.743864000  | -1.617745000 |
| 15 | 0.906205000  | -1.878054000 | -0.354229000 |
| 6  | -0.572625000 | 2.159997000  | 0.650628000  |

|   |              |             |             |
|---|--------------|-------------|-------------|
| 1 | -0.709862000 | 3.171864000 | 0.246227000 |
| 1 | -1.271650000 | 2.028304000 | 1.477519000 |
| 1 | 0.452970000  | 2.114368000 | 1.044809000 |

**TS7n-H:** (Imaginary frequency =  $386.59i$  cm<sup>-1</sup>)

|   |              |              |              |
|---|--------------|--------------|--------------|
| 6 | 0.275217000  | -1.566531000 | -0.606635000 |
| 6 | 0.870382000  | -1.828555000 | 0.716926000  |
| 6 | 1.757451000  | -1.022395000 | 1.378454000  |
| 1 | 2.388574000  | 1.569902000  | -1.314320000 |
| 1 | 0.477713000  | -2.708500000 | 1.218565000  |
| 6 | 2.297369000  | 0.197742000  | 0.844132000  |
| 1 | 3.091678000  | 0.680285000  | 1.409776000  |
| 6 | 0.812384000  | -0.423461000 | -1.338328000 |
| 1 | 0.418655000  | -0.278101000 | -2.341359000 |
| 6 | 0.583654000  | 1.611499000  | 1.231848000  |
| 1 | 1.242163000  | 2.474054000  | 1.188020000  |
| 6 | -0.386914000 | 1.443464000  | 0.257572000  |
| 6 | -1.500392000 | 0.509066000  | 0.581756000  |
| 8 | -1.576662000 | -0.139215000 | 1.611914000  |
| 8 | -2.424807000 | 0.458046000  | -0.398097000 |
| 6 | -3.460723000 | -0.525460000 | -0.214650000 |

|    |              |              |              |
|----|--------------|--------------|--------------|
| 1  | -4.010398000 | -0.335097000 | 0.710802000  |
| 1  | -4.115560000 | -0.417074000 | -1.080017000 |
| 1  | -3.015387000 | -1.521442000 | -0.189654000 |
| 1  | 0.415375000  | 1.174973000  | 2.208745000  |
| 8  | -0.683371000 | -2.233575000 | -1.023354000 |
| 1  | 2.017852000  | -1.280928000 | 2.403574000  |
| 15 | 2.394863000  | 0.208499000  | -0.926585000 |
| 6  | -0.524994000 | 2.406584000  | -0.897503000 |
| 1  | -1.138839000 | 3.268517000  | -0.598815000 |
| 1  | 0.451261000  | 2.802186000  | -1.199505000 |
| 1  | -1.007912000 | 1.949978000  | -1.762175000 |

**TS7x-H:** (Imaginary frequency =  $385.76i$  cm<sup>-1</sup>)

|   |              |              |              |
|---|--------------|--------------|--------------|
| 6 | -1.451340000 | 1.339950000  | -0.743695000 |
| 6 | -2.548602000 | 0.917724000  | 0.149115000  |
| 6 | -2.705965000 | -0.328288000 | 0.686981000  |
| 1 | 0.089152000  | -2.127526000 | -1.158153000 |
| 1 | -3.216560000 | 1.720518000  | 0.450942000  |
| 6 | -1.838113000 | -1.445193000 | 0.400629000  |
| 1 | -2.138234000 | -2.415992000 | 0.789455000  |
| 6 | -0.630762000 | 0.281297000  | -1.313464000 |

|    |              |              |              |
|----|--------------|--------------|--------------|
| 1  | 0.094945000  | 0.590539000  | -2.061699000 |
| 6  | -0.103194000 | -1.034548000 | 1.698191000  |
| 1  | 0.259264000  | -2.048359000 | 1.571005000  |
| 6  | 0.660279000  | 0.007993000  | 1.190011000  |
| 6  | 1.790645000  | -0.381054000 | 0.319153000  |
| 8  | 1.992295000  | -1.512253000 | -0.109460000 |
| 8  | 2.619089000  | 0.655875000  | 0.055390000  |
| 6  | 3.753711000  | 0.348147000  | -0.765406000 |
| 1  | 4.317108000  | 1.278392000  | -0.844753000 |
| 1  | 4.363390000  | -0.434254000 | -0.305265000 |
| 1  | 3.434811000  | 0.009847000  | -1.755536000 |
| 1  | -0.727799000 | -0.851197000 | 2.566494000  |
| 8  | -1.205204000 | 2.541484000  | -0.930501000 |
| 1  | -3.489640000 | -0.476814000 | 1.428787000  |
| 15 | -1.116656000 | -1.391030000 | -1.216928000 |
| 6  | 0.556923000  | 1.422356000  | 1.699137000  |
| 1  | 0.473545000  | 2.157512000  | 0.892493000  |
| 1  | -0.313305000 | 1.531294000  | 2.352953000  |
| 1  | 1.452228000  | 1.680343000  | 2.279849000  |

**TS6n-Me:** (Imaginary frequency =  $388.75i$   $\text{cm}^{-1}$ )

|   |              |              |              |
|---|--------------|--------------|--------------|
| 6 | -0.328822000 | -0.972610000 | 1.801516000  |
| 6 | -0.425574000 | -1.949576000 | 0.823664000  |
| 6 | -1.145442000 | -1.832498000 | -0.442498000 |
| 1 | 0.074458000  | -2.901250000 | 0.970544000  |
| 6 | -1.740306000 | -0.495069000 | -0.756737000 |
| 1 | -2.422380000 | -0.541129000 | -1.605289000 |
| 6 | -0.964379000 | 0.281326000  | 1.757027000  |
| 1 | -0.846584000 | 0.976142000  | 2.583768000  |
| 6 | -0.153246000 | 0.400026000  | -1.736518000 |
| 1 | -0.758462000 | 1.080500000  | -2.331627000 |
| 6 | 0.848903000  | 0.967496000  | -0.948542000 |
| 8 | -1.176076000 | -2.742679000 | -1.275328000 |
| 1 | 0.302679000  | -1.187289000 | 2.662437000  |
| 6 | 1.861697000  | 0.061364000  | -0.410267000 |
| 8 | 1.857655000  | -1.156580000 | -0.542609000 |
| 8 | 2.840252000  | 0.717910000  | 0.278533000  |
| 6 | 3.872842000  | -0.119168000 | 0.809337000  |
| 1 | 4.580337000  | 0.556283000  | 1.292985000  |
| 1 | 3.464731000  | -0.827781000 | 1.536290000  |
| 1 | 4.365741000  | -0.683617000 | 0.012438000  |
| 1 | 0.046098000  | -0.566810000 | -2.193843000 |

|    |              |             |              |
|----|--------------|-------------|--------------|
| 15 | -2.277438000 | 0.468694000 | 0.627013000  |
| 6  | 1.017851000  | 2.455121000 | -0.762845000 |
| 1  | 1.988551000  | 2.780188000 | -1.158922000 |
| 1  | 0.240573000  | 3.011304000 | -1.297046000 |
| 1  | 1.004737000  | 2.756954000 | 0.289933000  |
| 6  | -2.544345000 | 2.235845000 | 0.176726000  |
| 1  | -1.676682000 | 2.661769000 | -0.329890000 |
| 1  | -3.420452000 | 2.305480000 | -0.474361000 |
| 1  | -2.751497000 | 2.806099000 | 1.087444000  |

**TS6x-Me:** (Imaginary frequency =  $386.03i \text{ cm}^{-1}$ )

|   |              |              |              |
|---|--------------|--------------|--------------|
| 6 | -1.284230000 | -0.227038000 | 2.057228000  |
| 6 | -2.001164000 | -1.114166000 | 1.263026000  |
| 6 | -2.290233000 | -0.957458000 | -0.158957000 |
| 1 | -2.397707000 | -2.023413000 | 1.706626000  |
| 6 | -1.737866000 | 0.258679000  | -0.843059000 |
| 1 | -2.248299000 | 0.463055000  | -1.783859000 |
| 6 | -0.796106000 | 1.021544000  | 1.639910000  |
| 1 | -0.249391000 | 1.652227000  | 2.334328000  |
| 6 | -0.055056000 | -0.469553000 | -1.665493000 |
| 1 | 0.241277000  | 0.412752000  | -2.225470000 |



|    |              |              |              |
|----|--------------|--------------|--------------|
| 6  | 0.877680000  | -0.990493000 | -0.765651000 |
| 8  | -2.858524000 | -1.834144000 | -0.821608000 |
| 1  | -1.080704000 | -0.529895000 | 3.083488000  |
| 6  | 2.041191000  | -0.157624000 | -0.418685000 |
| 8  | 2.248532000  | 0.984057000  | -0.816043000 |
| 8  | 2.926151000  | -0.803104000 | 0.385466000  |
| 6  | 4.093715000  | -0.052281000 | 0.737185000  |
| 1  | 4.655761000  | 0.232800000  | -0.156524000 |
| 1  | 3.821084000  | 0.855337000  | 1.283807000  |
| 1  | 4.688309000  | -0.714107000 | 1.368378000  |
| 1  | -0.669368000 | -1.188550000 | -2.206811000 |
| 15 | -1.450553000 | 1.683406000  | 0.172628000  |
| 6  | 0.677684000  | -2.340063000 | -0.164173000 |
| 1  | 0.250854000  | -3.040384000 | -0.890490000 |
| 1  | 1.599069000  | -2.752740000 | 0.248949000  |
| 1  | -0.063469000 | -2.278417000 | 0.658379000  |
| 6  | -0.342478000 | 2.920368000  | -0.624602000 |
| 1  | -0.184958000 | 3.747881000  | 0.073984000  |
| 1  | 0.615338000  | 2.470680000  | -0.896268000 |
| 1  | -0.847593000 | 3.315710000  | -1.510827000 |

**TS7n-Me:** (Imaginary frequency =  $432.31i \text{ cm}^{-1}$ )

|   |              |              |              |
|---|--------------|--------------|--------------|
| 6 | -0.137052000 | -1.501032000 | -0.880807000 |
| 6 | 0.087597000  | -2.109623000 | 0.444591000  |
| 6 | 0.961204000  | -1.658762000 | 1.388186000  |
| 1 | -0.581344000 | -2.931282000 | 0.683047000  |
| 6 | 1.845742000  | -0.524111000 | 1.206012000  |
| 1 | 2.596296000  | -0.370570000 | 1.980428000  |
| 6 | 0.801196000  | -0.451771000 | -1.281483000 |
| 1 | 0.680432000  | -0.080533000 | -2.296935000 |
| 6 | 0.516096000  | 1.134014000  | 1.550247000  |
| 1 | 1.303015000  | 1.868796000  | 1.701595000  |
| 6 | -0.379177000 | 1.317610000  | 0.497187000  |
| 6 | -1.670320000 | 0.587043000  | 0.596059000  |
| 8 | -1.971744000 | -0.178073000 | 1.498127000  |
| 8 | -2.488607000 | 0.870040000  | -0.439307000 |
| 6 | -3.696584000 | 0.091762000  | -0.500150000 |
| 1 | -4.276176000 | 0.206162000  | 0.419473000  |
| 1 | -4.249178000 | 0.483154000  | -1.355153000 |
| 1 | -3.442471000 | -0.958570000 | -0.655775000 |
| 1 | 0.139344000  | 0.655650000  | 2.447138000  |
| 8 | -1.110484000 | -1.821993000 | -1.577895000 |

|    |              |              |              |
|----|--------------|--------------|--------------|
| 1  | 0.946031000  | -2.127774000 | 2.370376000  |
| 15 | 2.347063000  | -0.332939000 | -0.481750000 |
| 6  | -0.296759000 | 2.483095000  | -0.464955000 |
| 1  | -1.015661000 | 3.258755000  | -0.165010000 |
| 1  | 0.695182000  | 2.942119000  | -0.458986000 |
| 1  | -0.550240000 | 2.204567000  | -1.489263000 |
| 6  | 3.153856000  | 1.301242000  | -0.768463000 |
| 1  | 4.169579000  | 1.268494000  | -0.363506000 |
| 1  | 3.223939000  | 1.471258000  | -1.847200000 |
| 1  | 2.607189000  | 2.127264000  | -0.309923000 |

**TS7x-Me:** (Imaginary frequency =  $434.85i$  cm<sup>-1</sup>)

|   |             |              |              |
|---|-------------|--------------|--------------|
| 6 | 1.102034000 | -1.377581000 | -1.134667000 |
| 6 | 2.140133000 | -1.610051000 | -0.107548000 |
| 6 | 2.535149000 | -0.708719000 | 0.830587000  |
| 1 | 2.537460000 | -2.621464000 | -0.089629000 |
| 6 | 2.003930000 | 0.645052000  | 0.930128000  |
| 1 | 2.522845000 | 1.308700000  | 1.621036000  |
| 6 | 0.676289000 | 0.003753000  | -1.345384000 |
| 1 | 0.014892000 | 0.174723000  | -2.191133000 |
| 6 | 0.174852000 | 0.374046000  | 1.905152000  |

|    |              |              |              |
|----|--------------|--------------|--------------|
| 1  | -0.055264000 | 1.428874000  | 2.020074000  |
| 6  | -0.720444000 | -0.406317000 | 1.169443000  |
| 6  | -1.809084000 | 0.289265000  | 0.448468000  |
| 8  | -1.954073000 | 1.501559000  | 0.346606000  |
| 8  | -2.708371000 | -0.585013000 | -0.064785000 |
| 6  | -3.810228000 | 0.003366000  | -0.765815000 |
| 1  | -4.428442000 | -0.833431000 | -1.092775000 |
| 1  | -4.377561000 | 0.668866000  | -0.109180000 |
| 1  | -3.457803000 | 0.576746000  | -1.628188000 |
| 1  | 0.658044000  | -0.086676000 | 2.762542000  |
| 8  | 0.584550000  | -2.326370000 | -1.741644000 |
| 1  | 3.236369000  | -1.028173000 | 1.600190000  |
| 15 | 1.589790000  | 1.305791000  | -0.656241000 |
| 6  | -0.800819000 | -1.902464000 | 1.324971000  |
| 1  | -0.786066000 | -2.423448000 | 0.360769000  |
| 1  | 0.028579000  | -2.273501000 | 1.933355000  |
| 1  | -1.740229000 | -2.183445000 | 1.819789000  |
| 6  | 0.684632000  | 2.906132000  | -0.558248000 |
| 1  | -0.256053000 | 2.795852000  | -0.015472000 |
| 1  | 1.338868000  | 3.638204000  | -0.074939000 |
| 1  | 0.481992000  | 3.251020000  | -1.576767000 |

**CA6n-H:**

|   |              |              |              |
|---|--------------|--------------|--------------|
| 6 | 0.283899000  | -0.710902000 | -1.494114000 |
| 6 | 1.090310000  | -1.604246000 | -0.890065000 |
| 6 | 1.980656000  | -1.239950000 | 0.240856000  |
| 1 | 1.692439000  | 2.545995000  | -0.153337000 |
| 1 | 1.149352000  | -2.635963000 | -1.225350000 |
| 6 | 1.923228000  | 0.215879000  | 0.711819000  |
| 1 | 2.782150000  | 0.383062000  | 1.365966000  |
| 6 | 0.153550000  | 0.729667000  | -1.043501000 |
| 1 | -0.399127000 | 1.308055000  | -1.786248000 |
| 6 | 0.581458000  | 0.524347000  | 1.427077000  |
| 1 | 0.727732000  | 1.400316000  | 2.067482000  |
| 6 | -0.526516000 | 0.829023000  | 0.372674000  |
| 8 | 2.718709000  | -2.059125000 | 0.764681000  |
| 1 | -0.326181000 | -1.025750000 | -2.337767000 |
| 6 | -1.686002000 | -0.171815000 | 0.497307000  |
| 8 | -1.905439000 | -0.892032000 | 1.445542000  |
| 8 | -2.496005000 | -0.113854000 | -0.586846000 |
| 6 | -3.645649000 | -0.977583000 | -0.543720000 |
| 1 | -3.335964000 | -2.022932000 | -0.466088000 |

|    |              |              |              |
|----|--------------|--------------|--------------|
| 1  | -4.278569000 | -0.730231000 | 0.312337000  |
| 1  | -4.178101000 | -0.802000000 | -1.478912000 |
| 1  | 0.275541000  | -0.299540000 | 2.078315000  |
| 15 | 1.945432000  | 1.313773000  | -0.834101000 |
| 6  | -1.144659000 | 2.230614000  | 0.588694000  |
| 1  | -1.934314000 | 2.429627000  | -0.142056000 |
| 1  | -1.577371000 | 2.305688000  | 1.592540000  |
| 1  | -0.378831000 | 3.006976000  | 0.495446000  |

**CA6x-H:**

|   |              |              |              |
|---|--------------|--------------|--------------|
| 6 | 1.289692000  | 1.214441000  | 1.278702000  |
| 6 | 2.480630000  | 1.025858000  | 0.679164000  |
| 6 | 2.725752000  | -0.085421000 | -0.275630000 |
| 1 | -0.424281000 | -2.072996000 | 0.514696000  |
| 1 | 3.330731000  | 1.669854000  | 0.887444000  |
| 6 | 1.521009000  | -0.971737000 | -0.593180000 |
| 1 | 1.881491000  | -1.840550000 | -1.148335000 |
| 6 | 0.075545000  | 0.344381000  | 1.037462000  |
| 1 | -0.678856000 | 0.530396000  | 1.802222000  |
| 6 | 0.450109000  | -0.168208000 | -1.385568000 |
| 1 | -0.118734000 | -0.846308000 | -2.025473000 |

|    |              |              |              |
|----|--------------|--------------|--------------|
| 6  | -0.523185000 | 0.546126000  | -0.400626000 |
| 8  | 3.820779000  | -0.262040000 | -0.785710000 |
| 1  | 1.178560000  | 2.036597000  | 1.983980000  |
| 6  | -1.920340000 | -0.098464000 | -0.481648000 |
| 8  | -2.323055000 | -0.802805000 | -1.382038000 |
| 8  | -2.696840000 | 0.269299000  | 0.562608000  |
| 6  | -4.045869000 | -0.230376000 | 0.536698000  |
| 1  | -4.518560000 | 0.160021000  | 1.438246000  |
| 1  | -4.566935000 | 0.123070000  | -0.356652000 |
| 1  | -4.049368000 | -1.323299000 | 0.541497000  |
| 1  | 0.935114000  | 0.561885000  | -2.043942000 |
| 15 | 0.729758000  | -1.436380000 | 1.068103000  |
| 6  | -0.722262000 | 2.037959000  | -0.761919000 |
| 1  | -1.159817000 | 2.132431000  | -1.762135000 |
| 1  | -1.389055000 | 2.533246000  | -0.049162000 |
| 1  | 0.239783000  | 2.558376000  | -0.763542000 |

**CA7n-H:**

|   |              |             |              |
|---|--------------|-------------|--------------|
| 6 | -0.287741000 | 1.483859000 | -0.561329000 |
| 6 | -0.956041000 | 1.877174000 | 0.701787000  |
| 6 | -1.774974000 | 1.047432000 | 1.374534000  |

|    |              |              |              |
|----|--------------|--------------|--------------|
| 1  | -2.341190000 | -1.665936000 | -1.210401000 |
| 1  | -0.756712000 | 2.887318000  | 1.047727000  |
| 6  | -2.073750000 | -0.366456000 | 0.931739000  |
| 1  | -2.942703000 | -0.756073000 | 1.468598000  |
| 6  | -0.496816000 | 0.032819000  | -1.025296000 |
| 1  | -0.091069000 | -0.048321000 | -2.035272000 |
| 6  | -0.840295000 | -1.290521000 | 1.106308000  |
| 1  | -1.173148000 | -2.333113000 | 1.061683000  |
| 6  | 0.172490000  | -1.011585000 | -0.045266000 |
| 6  | 1.487983000  | -0.434950000 | 0.509793000  |
| 8  | 1.733823000  | -0.212542000 | 1.676291000  |
| 8  | 2.358955000  | -0.190507000 | -0.489443000 |
| 6  | 3.591408000  | 0.441936000  | -0.103748000 |
| 1  | 4.168130000  | 0.538788000  | -1.023573000 |
| 1  | 3.389597000  | 1.426094000  | 0.326046000  |
| 1  | 4.125282000  | -0.170464000 | 0.627244000  |
| 1  | -0.361347000 | -1.135855000 | 2.076784000  |
| 8  | 0.403263000  | 2.267525000  | -1.193968000 |
| 1  | -2.244984000 | 1.394829000  | 2.293219000  |
| 15 | -2.368928000 | -0.262939000 | -0.937180000 |
| 6  | 0.512831000  | -2.311079000 | -0.810418000 |



|   |              |              |              |
|---|--------------|--------------|--------------|
| 1 | 1.239822000  | -2.123476000 | -1.604078000 |
| 1 | 0.934006000  | -3.057303000 | -0.126694000 |
| 1 | -0.390663000 | -2.739985000 | -1.255241000 |

**CA7x-H:**

|   |              |              |              |
|---|--------------|--------------|--------------|
| 6 | -1.622276000 | 1.319224000  | -0.324464000 |
| 6 | -2.762396000 | 0.586463000  | 0.275941000  |
| 6 | -2.720670000 | -0.738330000 | 0.512697000  |
| 1 | 0.325728000  | -1.743711000 | -1.497800000 |
| 1 | -3.644238000 | 1.181035000  | 0.497907000  |
| 6 | -1.505715000 | -1.591075000 | 0.226051000  |
| 1 | -1.763140000 | -2.651629000 | 0.284446000  |
| 6 | -0.363281000 | 0.504357000  | -0.648625000 |
| 1 | 0.272299000  | 1.131311000  | -1.274094000 |
| 6 | -0.330229000 | -1.240248000 | 1.177330000  |
| 1 | 0.381443000  | -2.068122000 | 1.208649000  |
| 6 | 0.389705000  | 0.041124000  | 0.653487000  |
| 6 | 1.848873000  | -0.300249000 | 0.289736000  |
| 8 | 2.422430000  | -1.336597000 | 0.550482000  |
| 8 | 2.454712000  | 0.732330000  | -0.334636000 |
| 6 | 3.837852000  | 0.528853000  | -0.672228000 |

|    |              |              |              |
|----|--------------|--------------|--------------|
| 1  | 4.154311000  | 1.447090000  | -1.167301000 |
| 1  | 4.429674000  | 0.352785000  | 0.229728000  |
| 1  | 3.946186000  | -0.328272000 | -1.341710000 |
| 1  | -0.697619000 | -1.085362000 | 2.198062000  |
| 8  | -1.677996000 | 2.518863000  | -0.548490000 |
| 1  | -3.592800000 | -1.230567000 | 0.940891000  |
| 15 | -0.941902000 | -1.082827000 | -1.512245000 |
| 6  | 0.450502000  | 1.159669000  | 1.723390000  |
| 1  | 1.045096000  | 0.832149000  | 2.583995000  |
| 1  | 0.898394000  | 2.070550000  | 1.317901000  |
| 1  | -0.554165000 | 1.399646000  | 2.084269000  |

**CA6n-Me:**

|   |              |              |              |
|---|--------------|--------------|--------------|
| 6 | 0.094905000  | 0.811976000  | -1.529242000 |
| 6 | -0.369406000 | 1.927569000  | -0.934126000 |
| 6 | -1.288295000 | 1.888361000  | 0.231501000  |
| 1 | -0.123631000 | 2.917213000  | -1.308985000 |
| 6 | -1.695273000 | 0.498442000  | 0.730882000  |
| 1 | -2.555460000 | 0.629630000  | 1.392750000  |
| 6 | -0.197288000 | -0.583272000 | -1.013454000 |
| 1 | 0.143457000  | -1.330055000 | -1.733798000 |

|    |              |              |              |
|----|--------------|--------------|--------------|
| 6  | -0.518183000 | -0.209890000 | 1.450243000  |
| 1  | -0.919340000 | -1.014503000 | 2.074843000  |
| 6  | 0.466662000  | -0.802681000 | 0.398851000  |
| 8  | -1.710967000 | 2.910207000  | 0.749167000  |
| 1  | 0.726170000  | 0.898238000  | -2.410643000 |
| 6  | 1.827691000  | -0.088079000 | 0.484420000  |
| 8  | 2.209103000  | 0.611646000  | 1.396090000  |
| 8  | 2.602623000  | -0.387396000 | -0.585679000 |
| 6  | 3.914627000  | 0.201751000  | -0.578771000 |
| 1  | 3.843538000  | 1.292454000  | -0.566688000 |
| 1  | 4.477983000  | -0.126890000 | 0.298318000  |
| 1  | 4.394668000  | -0.142759000 | -1.495237000 |
| 1  | 0.006392000  | 0.476693000  | 2.120630000  |
| 15 | -2.089322000 | -0.540424000 | -0.807540000 |
| 6  | 0.768598000  | -2.299317000 | 0.654096000  |
| 1  | 1.504357000  | -2.675334000 | -0.062883000 |
| 1  | 1.172957000  | -2.438822000 | 1.663268000  |
| 1  | -0.135137000 | -2.905889000 | 0.566990000  |
| 6  | -2.620968000 | -2.177124000 | -0.070203000 |
| 1  | -3.714298000 | -2.149830000 | -0.000826000 |
| 1  | -2.363829000 | -2.985498000 | -0.764396000 |

|   |              |              |             |
|---|--------------|--------------|-------------|
| 1 | -2.222490000 | -2.420351000 | 0.917949000 |
|---|--------------|--------------|-------------|

**CA6x-Me:**

|   |              |             |              |
|---|--------------|-------------|--------------|
| 6 | -1.343015000 | 0.997751000 | -1.535065000 |
|---|--------------|-------------|--------------|

|   |              |             |              |
|---|--------------|-------------|--------------|
| 6 | -2.527074000 | 0.972161000 | -0.893644000 |
|---|--------------|-------------|--------------|

|   |              |             |             |
|---|--------------|-------------|-------------|
| 6 | -2.765131000 | 0.131458000 | 0.306932000 |
|---|--------------|-------------|-------------|

|   |              |             |              |
|---|--------------|-------------|--------------|
| 1 | -3.378388000 | 1.547361000 | -1.247639000 |
|---|--------------|-------------|--------------|

|   |              |              |             |
|---|--------------|--------------|-------------|
| 6 | -1.566311000 | -0.679487000 | 0.802407000 |
|---|--------------|--------------|-------------|

|   |              |              |             |
|---|--------------|--------------|-------------|
| 1 | -1.933728000 | -1.393991000 | 1.543527000 |
|---|--------------|--------------|-------------|

|   |              |             |              |
|---|--------------|-------------|--------------|
| 6 | -0.125452000 | 0.215446000 | -1.090296000 |
|---|--------------|-------------|--------------|

|   |             |             |              |
|---|-------------|-------------|--------------|
| 1 | 0.628597000 | 0.217346000 | -1.877744000 |
|---|-------------|-------------|--------------|

|   |              |             |             |
|---|--------------|-------------|-------------|
| 6 | -0.475795000 | 0.261320000 | 1.390560000 |
|---|--------------|-------------|-------------|

|   |             |              |             |
|---|-------------|--------------|-------------|
| 1 | 0.117471000 | -0.270622000 | 2.137490000 |
|---|-------------|--------------|-------------|

|   |             |             |             |
|---|-------------|-------------|-------------|
| 6 | 0.458758000 | 0.779162000 | 0.253950000 |
|---|-------------|-------------|-------------|

|   |              |             |             |
|---|--------------|-------------|-------------|
| 8 | -3.852847000 | 0.098153000 | 0.861303000 |
|---|--------------|-------------|-------------|

|   |              |             |              |
|---|--------------|-------------|--------------|
| 1 | -1.241767000 | 1.610517000 | -2.429552000 |
|---|--------------|-------------|--------------|

|   |             |             |             |
|---|-------------|-------------|-------------|
| 6 | 1.903778000 | 0.307576000 | 0.489882000 |
|---|-------------|-------------|-------------|

|   |             |             |             |
|---|-------------|-------------|-------------|
| 8 | 2.378626000 | 0.030009000 | 1.571385000 |
|---|-------------|-------------|-------------|

|   |             |             |              |
|---|-------------|-------------|--------------|
| 8 | 2.635385000 | 0.319283000 | -0.646561000 |
|---|-------------|-------------|--------------|

|   |             |              |              |
|---|-------------|--------------|--------------|
| 6 | 4.026594000 | -0.013173000 | -0.489346000 |
|---|-------------|--------------|--------------|

|   |             |             |              |
|---|-------------|-------------|--------------|
| 1 | 4.453909000 | 0.041202000 | -1.490888000 |
|---|-------------|-------------|--------------|

|    |              |              |              |
|----|--------------|--------------|--------------|
| 1  | 4.516653000  | 0.699265000  | 0.178998000  |
| 1  | 4.134732000  | -1.019545000 | -0.077244000 |
| 1  | -0.946542000 | 1.100834000  | 1.915382000  |
| 15 | -0.827224000 | -1.516714000 | -0.731871000 |
| 6  | 0.564911000  | 2.327435000  | 0.256672000  |
| 1  | 1.001323000  | 2.673478000  | 1.200052000  |
| 1  | 1.197348000  | 2.681882000  | -0.564203000 |
| 1  | -0.425737000 | 2.777482000  | 0.153359000  |
| 6  | 0.583876000  | -2.507286000 | -0.008168000 |
| 1  | 1.318110000  | -2.699270000 | -0.798994000 |
| 1  | 1.095143000  | -2.071216000 | 0.852744000  |
| 1  | 0.171088000  | -3.477735000 | 0.290467000  |

**CA7n-Me:**

|   |              |             |              |
|---|--------------|-------------|--------------|
| 6 | 0.169948000  | 1.489578000 | -0.744799000 |
| 6 | -0.085547000 | 2.136346000 | 0.567587000  |
| 6 | -0.934757000 | 1.618703000 | 1.475443000  |
| 1 | 0.424752000  | 3.079892000 | 0.739224000  |
| 6 | -1.683842000 | 0.320330000 | 1.274799000  |
| 1 | -2.513323000 | 0.248043000 | 1.984391000  |
| 6 | -0.423963000 | 0.081790000 | -0.920067000 |

|    |              |              |              |
|----|--------------|--------------|--------------|
| 1  | -0.238914000 | -0.225654000 | -1.951341000 |
| 6  | -0.732497000 | -0.897203000 | 1.391102000  |
| 1  | -1.326389000 | -1.813898000 | 1.470355000  |
| 6  | 0.166063000  | -0.950059000 | 0.122342000  |
| 6  | 1.622805000  | -0.599793000 | 0.488414000  |
| 8  | 2.063838000  | -0.454117000 | 1.608548000  |
| 8  | 2.381428000  | -0.503915000 | -0.622183000 |
| 6  | 3.756132000  | -0.138920000 | -0.414396000 |
| 1  | 4.199408000  | -0.100077000 | -1.409323000 |
| 1  | 3.819553000  | 0.838245000  | 0.070628000  |
| 1  | 4.260939000  | -0.882780000 | 0.207555000  |
| 1  | -0.112987000 | -0.834442000 | 2.289773000  |
| 8  | 0.803618000  | 2.048176000  | -1.625521000 |
| 1  | -1.104161000 | 2.154720000  | 2.407992000  |
| 15 | -2.265651000 | 0.363617000  | -0.530965000 |
| 6  | 0.213782000  | -2.371328000 | -0.491398000 |
| 1  | 0.888976000  | -2.400796000 | -1.350343000 |
| 1  | 0.571794000  | -3.094804000 | 0.250663000  |
| 1  | -0.777030000 | -2.690590000 | -0.822064000 |
| 6  | -3.100011000 | -1.291330000 | -0.785735000 |
| 1  | -4.168572000 | -1.150712000 | -0.588520000 |

|   |              |              |              |
|---|--------------|--------------|--------------|
| 1 | -3.000215000 | -1.578716000 | -1.838696000 |
| 1 | -2.738809000 | -2.112526000 | -0.162321000 |

**CA7x-Me:**

|   |              |              |              |
|---|--------------|--------------|--------------|
| 6 | -1.648870000 | 1.251968000  | -0.737937000 |
| 6 | -2.766983000 | 0.835211000  | 0.143756000  |
| 6 | -2.731902000 | -0.303949000 | 0.861097000  |
| 1 | -3.630109000 | 1.495084000  | 0.159044000  |
| 6 | -1.549891000 | -1.246422000 | 0.860966000  |
| 1 | -1.829371000 | -2.204483000 | 1.308411000  |
| 6 | -0.402364000 | 0.355095000  | -0.739288000 |
| 1 | 0.233703000  | 0.691981000  | -1.558139000 |
| 6 | -0.331338000 | -0.620091000 | 1.588942000  |
| 1 | 0.386613000  | -1.396001000 | 1.863373000  |
| 6 | 0.348178000  | 0.418467000  | 0.644099000  |
| 6 | 1.840065000  | 0.081920000  | 0.473957000  |
| 8 | 2.484115000  | -0.647291000 | 1.200470000  |
| 8 | 2.393792000  | 0.761787000  | -0.551681000 |
| 6 | 3.809152000  | 0.576538000  | -0.728660000 |
| 1 | 4.077889000  | 1.194355000  | -1.585655000 |
| 1 | 4.351439000  | 0.897176000  | 0.164432000  |

|    |              |              |              |
|----|--------------|--------------|--------------|
| 1  | 4.035993000  | -0.474706000 | -0.923961000 |
| 1  | -0.648004000 | -0.142784000 | 2.523322000  |
| 8  | -1.715514000 | 2.259924000  | -1.424768000 |
| 1  | -3.591554000 | -0.572705000 | 1.473623000  |
| 15 | -1.071390000 | -1.408748000 | -0.969869000 |
| 6  | 0.336379000  | 1.848607000  | 1.250978000  |
| 1  | 0.941061000  | 1.876101000  | 2.164784000  |
| 1  | 0.738045000  | 2.580032000  | 0.544436000  |
| 1  | -0.682228000 | 2.145444000  | 1.515654000  |
| 6  | 0.453264000  | -2.488841000 | -0.944942000 |
| 1  | 0.993833000  | -2.339659000 | -1.886976000 |
| 1  | 1.144232000  | -2.333446000 | -0.114055000 |
| 1  | 0.116016000  | -3.531552000 | -0.930233000 |

**THF Solvent:**

**1a:**

|   |              |              |              |
|---|--------------|--------------|--------------|
| 6 | -0.373089000 | -1.210098000 | -0.000002000 |
| 6 | -1.337564000 | -0.111411000 | -0.000008000 |
| 6 | -0.796111000 | 1.247194000  | -0.000001000 |
| 6 | 0.529219000  | 1.632850000  | 0.000000000  |
| 6 | 1.654693000  | 0.770230000  | -0.000001000 |



|    |              |              |             |
|----|--------------|--------------|-------------|
| 1  | 2.252393000  | -1.867034000 | 0.000004000 |
| 1  | -0.733197000 | -2.232488000 | 0.000000000 |
| 1  | -1.553805000 | 2.026431000  | 0.000001000 |
| 1  | 0.741590000  | 2.700195000  | 0.000002000 |
| 1  | 2.673854000  | 1.133328000  | 0.000001000 |
| 8  | -2.566998000 | -0.333098000 | 0.000006000 |
| 15 | 1.272818000  | -0.871215000 | 0.000000000 |

**1b:**

|    |              |              |              |
|----|--------------|--------------|--------------|
| 6  | -0.224315000 | -1.132363000 | -0.009324000 |
| 6  | -1.572658000 | -0.570042000 | 0.002476000  |
| 6  | -1.684059000 | 0.886883000  | 0.010712000  |
| 6  | -0.657153000 | 1.807703000  | 0.008727000  |
| 6  | 0.731104000  | 1.517067000  | 0.000749000  |
| 1  | -0.107163000 | -2.210657000 | -0.019961000 |
| 1  | -2.706013000 | 1.257042000  | 0.018701000  |
| 1  | -0.928586000 | 2.861959000  | 0.014031000  |
| 1  | 1.486822000  | 2.292162000  | -0.004693000 |
| 8  | -2.582318000 | -1.309055000 | 0.010385000  |
| 15 | 1.121174000  | -0.123757000 | -0.035323000 |
| 6  | 2.834563000  | -0.730213000 | 0.037528000  |

|   |             |              |              |
|---|-------------|--------------|--------------|
| 1 | 3.494272000 | 0.039024000  | -0.371008000 |
| 1 | 3.117815000 | -0.947882000 | 1.070172000  |
| 1 | 2.918889000 | -1.637068000 | -0.565696000 |

**MMA:**

|   |              |              |              |
|---|--------------|--------------|--------------|
| 6 | 1.360513000  | 1.580935000  | -0.000250000 |
| 1 | 0.544568000  | 2.294827000  | -0.000373000 |
| 1 | 2.370656000  | 1.981518000  | -0.000312000 |
| 6 | 1.144229000  | 0.258846000  | -0.000037000 |
| 6 | -0.241569000 | -0.300293000 | 0.000043000  |
| 8 | -0.482609000 | -1.496012000 | 0.000186000  |
| 8 | -1.206367000 | 0.642530000  | -0.000062000 |
| 6 | -2.558519000 | 0.152494000  | -0.000030000 |
| 1 | -2.747763000 | -0.451123000 | 0.891278000  |
| 1 | -3.190196000 | 1.040634000  | -0.000490000 |
| 1 | -2.747537000 | -0.451909000 | -0.890847000 |
| 6 | 2.245941000  | -0.768650000 | 0.000140000  |
| 1 | 2.175900000  | -1.420095000 | 0.878793000  |
| 1 | 2.175880000  | -1.420423000 | -0.878267000 |
| 1 | 3.226726000  | -0.285557000 | 0.000040000  |

**TS6n-H:** (Imaginary frequency =  $967.41i$  cm<sup>-1</sup>)

|   |              |              |              |
|---|--------------|--------------|--------------|
| 6 | -0.575583000 | -0.645000000 | 1.779989000  |
| 6 | -1.091930000 | -1.564359000 | 0.875007000  |
| 6 | -1.826793000 | -1.257958000 | -0.343317000 |
| 1 | -1.708356000 | 2.582880000  | 0.223702000  |
| 1 | -0.908219000 | -2.621480000 | 1.043271000  |
| 6 | -2.024838000 | 0.177266000  | -0.654591000 |
| 1 | -2.720858000 | 0.354963000  | -1.472410000 |
| 6 | -0.772506000 | 0.741094000  | 1.714444000  |
| 1 | -0.347413000 | 1.387771000  | 2.475690000  |
| 6 | -0.226503000 | 0.574156000  | -1.745613000 |
| 1 | -0.695997000 | 1.375299000  | -2.309324000 |
| 6 | 0.861438000  | 0.891103000  | -0.945226000 |
| 8 | -2.180451000 | -2.142898000 | -1.144551000 |
| 1 | 0.047197000  | -1.032005000 | 2.584623000  |
| 6 | 1.686727000  | -0.226916000 | -0.468383000 |
| 8 | 1.434557000  | -1.411898000 | -0.656816000 |
| 8 | 2.787591000  | 0.186395000  | 0.210401000  |
| 6 | 3.644798000  | -0.858163000 | 0.695271000  |
| 1 | 4.484230000  | -0.351390000 | 1.172033000  |
| 1 | 3.117418000  | -1.484612000 | 1.420140000  |

|    |              |              |              |
|----|--------------|--------------|--------------|
| 1  | 3.995269000  | -1.484985000 | -0.128913000 |
| 1  | -0.286616000 | -0.416951000 | -2.184350000 |
| 15 | -2.087092000 | 1.312569000  | 0.706472000  |
| 6  | 1.287766000  | 2.314840000  | -0.698825000 |
| 1  | 2.099679000  | 2.599395000  | -1.383705000 |
| 1  | 0.458662000  | 3.006688000  | -0.878810000 |
| 1  | 1.662358000  | 2.466727000  | 0.316160000  |

**TS6x-H:** (Imaginary frequency =  $357.53i$  cm<sup>-1</sup>)

|   |              |              |              |
|---|--------------|--------------|--------------|
| 6 | 1.248050000  | -0.249949000 | 1.921439000  |
| 6 | 2.282734000  | 0.411224000  | 1.272767000  |
| 6 | 2.596931000  | 0.335408000  | -0.146032000 |
| 1 | -0.270391000 | -2.155432000 | -0.924644000 |
| 1 | 2.907555000  | 1.092142000  | 1.844974000  |
| 6 | 1.727007000  | -0.537243000 | -0.970016000 |
| 1 | 2.097703000  | -0.701122000 | -1.980152000 |
| 6 | 0.397603000  | -1.197284000 | 1.327895000  |
| 1 | -0.366878000 | -1.686892000 | 1.923127000  |
| 6 | 0.175837000  | 0.843341000  | -1.511750000 |
| 1 | -0.125779000 | 0.218141000  | -2.344932000 |
| 6 | -0.741847000 | 1.060349000  | -0.495229000 |

|    |              |              |              |
|----|--------------|--------------|--------------|
| 8  | 3.478399000  | 1.042110000  | -0.671513000 |
| 1  | 1.075869000  | -0.001704000 | 2.967403000  |
| 6  | -1.934588000 | 0.196534000  | -0.486687000 |
| 8  | -2.108166000 | -0.763669000 | -1.234386000 |
| 8  | -2.856317000 | 0.574815000  | 0.429992000  |
| 6  | -4.047122000 | -0.226766000 | 0.485862000  |
| 1  | -4.557749000 | -0.227162000 | -0.480523000 |
| 1  | -3.805822000 | -1.256436000 | 0.763771000  |
| 1  | -4.674466000 | 0.234983000  | 1.248447000  |
| 1  | 0.919958000  | 1.606049000  | -1.727076000 |
| 15 | 0.906912000  | -1.898939000 | -0.189879000 |
| 6  | -0.587449000 | 2.199960000  | 0.471893000  |
| 1  | -0.906998000 | 3.146340000  | 0.013410000  |
| 1  | -1.177107000 | 2.053945000  | 1.378188000  |
| 1  | 0.466158000  | 2.321738000  | 0.752589000  |

**TS7n-H:** (Imaginary frequency =  $401.87i \text{ cm}^{-1}$ )

|   |             |              |              |
|---|-------------|--------------|--------------|
| 6 | 0.332621000 | -1.586018000 | -0.591927000 |
| 6 | 0.949737000 | -1.824330000 | 0.721640000  |
| 6 | 1.807188000 | -0.979780000 | 1.374517000  |
| 1 | 2.323071000 | 1.614881000  | -1.351115000 |

|    |              |              |              |
|----|--------------|--------------|--------------|
| 1  | 0.606562000  | -2.721845000 | 1.229200000  |
| 6  | 2.288812000  | 0.262106000  | 0.831363000  |
| 1  | 3.066872000  | 0.778474000  | 1.388463000  |
| 6  | 0.821063000  | -0.436250000 | -1.336312000 |
| 1  | 0.416472000  | -0.303909000 | -2.336869000 |
| 6  | 0.561389000  | 1.583788000  | 1.245871000  |
| 1  | 1.193938000  | 2.465642000  | 1.218025000  |
| 6  | -0.411403000 | 1.418039000  | 0.269143000  |
| 6  | -1.519634000 | 0.477787000  | 0.572305000  |
| 8  | -1.609507000 | -0.189577000 | 1.592676000  |
| 8  | -2.445513000 | 0.443840000  | -0.409478000 |
| 6  | -3.510367000 | -0.507188000 | -0.227188000 |
| 1  | -4.065316000 | -0.294301000 | 0.690003000  |
| 1  | -4.155604000 | -0.389809000 | -1.098160000 |
| 1  | -3.098561000 | -1.517184000 | -0.187187000 |
| 1  | 0.401171000  | 1.136891000  | 2.219445000  |
| 8  | -0.607622000 | -2.299462000 | -0.998101000 |
| 1  | 2.090676000  | -1.224200000 | 2.396438000  |
| 15 | 2.379119000  | 0.265370000  | -0.940160000 |
| 6  | -0.551131000 | 2.396862000  | -0.872111000 |
| 1  | -1.196498000 | 3.234357000  | -0.570716000 |

|   |              |             |              |
|---|--------------|-------------|--------------|
| 1 | 0.419361000  | 2.826601000 | -1.140673000 |
| 1 | -0.997440000 | 1.945339000 | -1.759032000 |

**TS7x-H:** (Imaginary frequency =  $399.71i$  cm<sup>-1</sup>)

|   |              |              |              |
|---|--------------|--------------|--------------|
| 6 | -1.402914000 | 1.377793000  | -0.713079000 |
| 6 | -2.492113000 | 0.965143000  | 0.187607000  |
| 6 | -2.679276000 | -0.291300000 | 0.692240000  |
| 1 | 0.024233000  | -2.118607000 | -1.266162000 |
| 1 | -3.133531000 | 1.774269000  | 0.527715000  |
| 6 | -1.850225000 | -1.424847000 | 0.359491000  |
| 1 | -2.178445000 | -2.396964000 | 0.719971000  |
| 6 | -0.620033000 | 0.320153000  | -1.320890000 |
| 1 | 0.110706000  | 0.623162000  | -2.066830000 |
| 6 | -0.128790000 | -1.140471000 | 1.643659000  |
| 1 | 0.220402000  | -2.149213000 | 1.454503000  |
| 6 | 0.652339000  | -0.077520000 | 1.204635000  |
| 6 | 1.782174000  | -0.413213000 | 0.312620000  |
| 8 | 2.001918000  | -1.525623000 | -0.158033000 |
| 8 | 2.588752000  | 0.647490000  | 0.081778000  |
| 6 | 3.723282000  | 0.400263000  | -0.764368000 |
| 1 | 4.262660000  | 1.346218000  | -0.812827000 |

|    |              |              |              |
|----|--------------|--------------|--------------|
| 1  | 4.358615000  | -0.381181000 | -0.339564000 |
| 1  | 3.399274000  | 0.095870000  | -1.763279000 |
| 1  | -0.741425000 | -1.006676000 | 2.529428000  |
| 8  | -1.136123000 | 2.586390000  | -0.881995000 |
| 1  | -3.452208000 | -0.437946000 | 1.444348000  |
| 15 | -1.154346000 | -1.341279000 | -1.269215000 |
| 6  | 0.550797000  | 1.303713000  | 1.797037000  |
| 1  | 0.480621000  | 2.085209000  | 1.033611000  |
| 1  | -0.324520000 | 1.377658000  | 2.448241000  |
| 1  | 1.440987000  | 1.523044000  | 2.401370000  |

**TS6n-Me:** (Imaginary frequency =  $403.61i$  cm<sup>-1</sup>)

|   |              |              |              |
|---|--------------|--------------|--------------|
| 6 | 0.296650000  | 0.913618000  | 1.817740000  |
| 6 | 0.364538000  | 1.929126000  | 0.876021000  |
| 6 | 1.064587000  | 1.864954000  | -0.396578000 |
| 1 | -0.160582000 | 2.860161000  | 1.065371000  |
| 6 | 1.700736000  | 0.562615000  | -0.754838000 |
| 1 | 2.375120000  | 0.652224000  | -1.605882000 |
| 6 | 0.982073000  | -0.312371000 | 1.735348000  |
| 1 | 0.889924000  | -1.037277000 | 2.538883000  |
| 6 | 0.182649000  | -0.382538000 | -1.712724000 |



|    |              |              |              |
|----|--------------|--------------|--------------|
| 1  | 0.810852000  | -1.052196000 | -2.295369000 |
| 6  | -0.809451000 | -0.975650000 | -0.923912000 |
| 8  | 1.050589000  | 2.802988000  | -1.212684000 |
| 1  | -0.340576000 | 1.076370000  | 2.685271000  |
| 6  | -1.868502000 | -0.101668000 | -0.424984000 |
| 8  | -1.923697000 | 1.112142000  | -0.606095000 |
| 8  | -2.817017000 | -0.774730000 | 0.282631000  |
| 6  | -3.895312000 | 0.024947000  | 0.787441000  |
| 1  | -4.562720000 | -0.669877000 | 1.298406000  |
| 1  | -3.524411000 | 0.778846000  | 1.487520000  |
| 1  | -4.422158000 | 0.527223000  | -0.028669000 |
| 1  | -0.061728000 | 0.559007000  | -2.199893000 |
| 15 | 2.296770000  | -0.415782000 | 0.599175000  |
| 6  | -0.923512000 | -2.466097000 | -0.720120000 |
| 1  | -1.876223000 | -2.832247000 | -1.124610000 |
| 1  | -0.120280000 | -2.997928000 | -1.238528000 |
| 1  | -0.908269000 | -2.755761000 | 0.335709000  |
| 6  | 2.679810000  | -2.144653000 | 0.106055000  |
| 1  | 1.839687000  | -2.619270000 | -0.403402000 |
| 1  | 3.551460000  | -2.133823000 | -0.553743000 |
| 1  | 2.933748000  | -2.715607000 | 1.003795000  |

**TS6x-Me:** (Imaginary frequency = 391.63i cm<sup>-1</sup>)

|   |              |              |              |
|---|--------------|--------------|--------------|
| 6 | -1.208953000 | -0.274930000 | 2.046776000  |
| 6 | -1.967492000 | -1.137037000 | 1.261435000  |
| 6 | -2.305483000 | -0.942032000 | -0.139894000 |
| 1 | -2.355700000 | -2.049761000 | 1.705418000  |
| 6 | -1.746715000 | 0.268346000  | -0.820128000 |
| 1 | -2.269837000 | 0.496630000  | -1.748319000 |
| 6 | -0.731986000 | 0.981577000  | 1.641123000  |
| 1 | -0.162070000 | 1.595108000  | 2.332196000  |
| 6 | -0.087843000 | -0.430720000 | -1.660769000 |
| 1 | 0.198306000  | 0.464155000  | -2.205611000 |
| 6 | 0.862028000  | -0.971886000 | -0.786118000 |
| 8 | -2.932765000 | -1.792011000 | -0.797856000 |
| 1 | -0.966244000 | -0.603661000 | 3.055841000  |
| 6 | 2.033234000  | -0.153016000 | -0.437408000 |
| 8 | 2.257096000  | 0.985504000  | -0.841874000 |
| 8 | 2.906048000  | -0.805562000 | 0.371456000  |
| 6 | 4.087089000  | -0.074587000 | 0.732329000  |
| 1 | 4.663759000  | 0.192671000  | -0.157166000 |
| 1 | 3.825856000  | 0.837760000  | 1.275594000  |

|    |              |              |              |
|----|--------------|--------------|--------------|
| 1  | 4.662359000  | -0.745424000 | 1.370873000  |
| 1  | -0.688902000 | -1.142779000 | -2.225820000 |
| 15 | -1.432236000 | 1.678909000  | 0.211844000  |
| 6  | 0.676995000  | -2.344326000 | -0.231087000 |
| 1  | 0.282192000  | -3.029260000 | -0.990244000 |
| 1  | 1.597745000  | -2.754786000 | 0.185074000  |
| 1  | -0.080195000 | -2.325586000 | 0.578116000  |
| 6  | -0.368241000 | 2.940861000  | -0.597880000 |
| 1  | -0.202007000 | 3.758068000  | 0.109947000  |
| 1  | 0.585898000  | 2.508344000  | -0.904764000 |
| 1  | -0.906470000 | 3.337933000  | -1.462887000 |

**TS7n-Me:** (Imaginary frequency =  $444.90i \text{ cm}^{-1}$ )

|   |              |              |              |
|---|--------------|--------------|--------------|
| 6 | -0.075527000 | -1.542175000 | -0.868507000 |
| 6 | 0.117350000  | -2.105081000 | 0.477945000  |
| 6 | 0.950556000  | -1.605788000 | 1.433285000  |
| 1 | -0.533147000 | -2.940302000 | 0.722280000  |
| 6 | 1.810728000  | -0.450674000 | 1.244149000  |
| 1 | 2.537818000  | -0.263502000 | 2.032550000  |
| 6 | 0.857059000  | -0.500509000 | -1.280910000 |
| 1 | 0.764894000  | -0.156747000 | -2.308863000 |

|    |              |              |              |
|----|--------------|--------------|--------------|
| 6  | 0.487683000  | 1.152337000  | 1.522428000  |
| 1  | 1.259398000  | 1.905638000  | 1.658644000  |
| 6  | -0.410887000 | 1.309509000  | 0.462186000  |
| 6  | -1.697789000 | 0.585794000  | 0.570567000  |
| 8  | -2.019793000 | -0.151702000 | 1.493061000  |
| 8  | -2.513402000 | 0.838177000  | -0.478473000 |
| 6  | -3.749824000 | 0.105265000  | -0.493342000 |
| 1  | -4.336296000 | 0.314969000  | 0.404825000  |
| 1  | -4.280068000 | 0.446519000  | -1.382849000 |
| 1  | -3.543785000 | -0.965219000 | -0.558489000 |
| 1  | 0.105986000  | 0.713062000  | 2.437595000  |
| 8  | -1.021994000 | -1.915425000 | -1.590558000 |
| 1  | 0.922107000  | -2.047631000 | 2.427283000  |
| 15 | 2.365453000  | -0.303913000 | -0.432199000 |
| 6  | -0.313758000 | 2.443568000  | -0.535316000 |
| 1  | -1.036033000 | 3.229401000  | -0.271833000 |
| 1  | 0.677920000  | 2.900781000  | -0.525887000 |
| 1  | -0.545569000 | 2.134161000  | -1.556127000 |
| 6  | 3.174915000  | 1.313139000  | -0.771685000 |
| 1  | 4.183907000  | 1.291475000  | -0.351288000 |
| 1  | 3.255184000  | 1.441214000  | -1.855018000 |

|   |             |             |              |
|---|-------------|-------------|--------------|
| 1 | 2.624373000 | 2.154164000 | -0.346875000 |
|---|-------------|-------------|--------------|

**TS7x-Me:** (Imaginary frequency =  $440.66i$  cm<sup>-1</sup>)

|   |             |              |              |
|---|-------------|--------------|--------------|
| 6 | 1.036829000 | -1.385746000 | -1.148080000 |
|---|-------------|--------------|--------------|

|   |             |              |              |
|---|-------------|--------------|--------------|
| 6 | 2.060654000 | -1.667072000 | -0.124832000 |
|---|-------------|--------------|--------------|

|   |             |              |             |
|---|-------------|--------------|-------------|
| 6 | 2.490977000 | -0.787139000 | 0.819163000 |
|---|-------------|--------------|-------------|

|   |             |              |              |
|---|-------------|--------------|--------------|
| 1 | 2.420601000 | -2.692549000 | -0.107848000 |
|---|-------------|--------------|--------------|

|   |             |             |             |
|---|-------------|-------------|-------------|
| 6 | 2.009589000 | 0.584644000 | 0.927629000 |
|---|-------------|-------------|-------------|

|   |             |             |             |
|---|-------------|-------------|-------------|
| 1 | 2.554274000 | 1.223509000 | 1.620908000 |
|---|-------------|-------------|-------------|

|   |             |             |              |
|---|-------------|-------------|--------------|
| 6 | 0.671382000 | 0.006299000 | -1.358528000 |
|---|-------------|-------------|--------------|

|   |             |             |              |
|---|-------------|-------------|--------------|
| 1 | 0.016078000 | 0.214101000 | -2.201070000 |
|---|-------------|-------------|--------------|

|   |             |             |             |
|---|-------------|-------------|-------------|
| 6 | 0.209468000 | 0.393361000 | 1.901228000 |
|---|-------------|-------------|-------------|

|   |             |             |             |
|---|-------------|-------------|-------------|
| 1 | 0.008402000 | 1.455679000 | 2.000208000 |
|---|-------------|-------------|-------------|

|   |              |              |             |
|---|--------------|--------------|-------------|
| 6 | -0.718204000 | -0.377241000 | 1.191276000 |
|---|--------------|--------------|-------------|

|   |              |             |             |
|---|--------------|-------------|-------------|
| 6 | -1.795050000 | 0.323993000 | 0.462538000 |
|---|--------------|-------------|-------------|

|   |              |             |             |
|---|--------------|-------------|-------------|
| 8 | -1.937344000 | 1.539123000 | 0.368753000 |
|---|--------------|-------------|-------------|

|   |              |              |              |
|---|--------------|--------------|--------------|
| 8 | -2.689819000 | -0.543805000 | -0.070363000 |
|---|--------------|--------------|--------------|

|   |              |             |              |
|---|--------------|-------------|--------------|
| 6 | -3.785809000 | 0.048427000 | -0.783363000 |
|---|--------------|-------------|--------------|

|   |              |              |              |
|---|--------------|--------------|--------------|
| 1 | -4.395206000 | -0.786975000 | -1.128687000 |
|---|--------------|--------------|--------------|

|   |              |             |              |
|---|--------------|-------------|--------------|
| 1 | -4.368121000 | 0.700556000 | -0.127001000 |
|---|--------------|-------------|--------------|

|   |              |             |              |
|---|--------------|-------------|--------------|
| 1 | -3.422121000 | 0.630861000 | -1.634401000 |
|---|--------------|-------------|--------------|

|    |              |              |              |
|----|--------------|--------------|--------------|
| 1  | 0.678480000  | -0.062229000 | 2.769348000  |
| 8  | 0.484078000  | -2.317706000 | -1.767471000 |
| 1  | 3.176206000  | -1.137762000 | 1.588551000  |
| 15 | 1.626013000  | 1.272845000  | -0.656607000 |
| 6  | -0.825943000 | -1.868319000 | 1.376715000  |
| 1  | -0.827646000 | -2.407983000 | 0.422528000  |
| 1  | 0.000535000  | -2.242825000 | 1.986142000  |
| 1  | -1.765932000 | -2.123416000 | 1.884740000  |
| 6  | 0.778744000  | 2.901286000  | -0.562837000 |
| 1  | -0.156060000 | 2.825742000  | -0.005520000 |
| 1  | 1.462835000  | 3.611277000  | -0.089657000 |
| 1  | 0.576345000  | 3.243485000  | -1.581931000 |

**CA6n-H:**

|   |             |              |              |
|---|-------------|--------------|--------------|
| 6 | 0.280272000 | -0.711027000 | -1.491656000 |
| 6 | 1.089667000 | -1.604044000 | -0.887758000 |
| 6 | 1.981414000 | -1.236026000 | 0.235875000  |
| 1 | 1.696087000 | 2.548036000  | -0.160571000 |
| 1 | 1.144322000 | -2.635428000 | -1.224821000 |
| 6 | 1.926454000 | 0.216066000  | 0.707616000  |
| 1 | 2.785809000 | 0.390523000  | 1.358972000  |

|    |              |              |              |
|----|--------------|--------------|--------------|
| 6  | 0.149417000  | 0.729074000  | -1.043828000 |
| 1  | -0.403633000 | 1.307238000  | -1.785557000 |
| 6  | 0.585524000  | 0.524491000  | 1.426249000  |
| 1  | 0.735983000  | 1.400447000  | 2.064565000  |
| 6  | -0.526090000 | 0.827747000  | 0.375911000  |
| 8  | 2.725285000  | -2.057428000 | 0.759718000  |
| 1  | -0.330466000 | -1.029816000 | -2.332899000 |
| 6  | -1.685336000 | -0.174250000 | 0.499042000  |
| 8  | -1.896506000 | -0.903163000 | 1.446928000  |
| 8  | -2.496392000 | -0.111551000 | -0.576109000 |
| 6  | -3.651392000 | -0.974233000 | -0.547709000 |
| 1  | -3.343001000 | -2.020567000 | -0.486884000 |
| 1  | -4.285820000 | -0.732369000 | 0.308138000  |
| 1  | -4.179227000 | -0.784116000 | -1.481810000 |
| 1  | 0.284559000  | -0.299003000 | 2.079956000  |
| 15 | 1.938568000  | 1.315141000  | -0.836706000 |
| 6  | -1.143160000 | 2.229885000  | 0.593777000  |
| 1  | -1.929904000 | 2.431517000  | -0.138863000 |
| 1  | -1.577371000 | 2.302992000  | 1.596885000  |
| 1  | -0.375578000 | 3.004473000  | 0.504076000  |

**CA6x-H:**

|   |              |              |              |
|---|--------------|--------------|--------------|
| 6 | -1.286835000 | 1.221923000  | -1.268929000 |
| 6 | -2.479896000 | 1.030361000  | -0.671714000 |
| 6 | -2.725066000 | -0.085795000 | 0.270877000  |
| 1 | 0.417272000  | -2.079495000 | -0.525936000 |
| 1 | -3.325395000 | 1.680886000  | -0.878094000 |
| 6 | -1.523574000 | -0.970830000 | 0.591059000  |
| 1 | -1.879467000 | -1.843945000 | 1.142125000  |
| 6 | -0.074092000 | 0.349358000  | -1.034938000 |
| 1 | 0.677458000  | 0.538443000  | -1.800941000 |
| 6 | -0.451929000 | -0.169061000 | 1.385847000  |
| 1 | 0.110527000  | -0.852567000 | 2.025038000  |
| 6 | 0.524884000  | 0.544663000  | 0.404551000  |
| 8 | -3.827455000 | -0.273720000 | 0.772497000  |
| 1 | -1.173684000 | 2.050319000  | -1.965484000 |
| 6 | 1.921846000  | -0.102168000 | 0.481545000  |
| 8 | 2.321572000  | -0.811470000 | 1.383608000  |
| 8 | 2.694831000  | 0.265686000  | -0.557320000 |
| 6 | 4.048858000  | -0.230575000 | -0.545995000 |
| 1 | 4.511751000  | 0.168741000  | -1.447829000 |
| 1 | 4.574460000  | 0.121368000  | 0.344645000  |



|    |              |              |              |
|----|--------------|--------------|--------------|
| 1  | 4.053462000  | -1.322873000 | -0.562853000 |
| 1  | -0.934856000 | 0.560900000  | 2.045144000  |
| 15 | -0.729887000 | -1.428176000 | -1.070426000 |
| 6  | 0.726404000  | 2.035716000  | 0.769468000  |
| 1  | 1.167857000  | 2.126766000  | 1.768041000  |
| 1  | 1.389255000  | 2.532592000  | 0.054703000  |
| 1  | -0.235522000 | 2.555994000  | 0.776931000  |

**CA7n-H:**

|   |              |              |              |
|---|--------------|--------------|--------------|
| 6 | -0.322801000 | 1.523076000  | -0.481610000 |
| 6 | -0.926561000 | 1.814199000  | 0.838012000  |
| 6 | -1.727420000 | 0.936252000  | 1.474121000  |
| 1 | -2.364185000 | -1.586917000 | -1.287629000 |
| 1 | -0.719998000 | 2.796748000  | 1.252894000  |
| 6 | -2.051107000 | -0.438592000 | 0.938677000  |
| 1 | -2.909562000 | -0.860105000 | 1.466451000  |
| 6 | -0.511540000 | 0.099766000  | -1.019862000 |
| 1 | -0.133353000 | 0.076384000  | -2.043163000 |
| 6 | -0.820326000 | -1.376614000 | 1.017837000  |
| 1 | -1.157589000 | -2.409655000 | 0.886884000  |
| 6 | 0.178573000  | -0.998293000 | -0.117010000 |

|    |              |              |              |
|----|--------------|--------------|--------------|
| 6  | 1.502639000  | -0.474715000 | 0.468071000  |
| 8  | 1.811531000  | -0.468602000 | 1.643354000  |
| 8  | 2.316521000  | -0.033215000 | -0.508257000 |
| 6  | 3.591142000  | 0.489764000  | -0.085567000 |
| 1  | 4.097984000  | 0.793400000  | -1.000899000 |
| 1  | 3.448083000  | 1.347518000  | 0.575685000  |
| 1  | 4.165180000  | -0.280273000 | 0.435128000  |
| 1  | -0.331981000 | -1.311646000 | 1.993421000  |
| 8  | 0.286518000  | 2.378354000  | -1.112925000 |
| 1  | -2.165107000 | 1.215506000  | 2.430736000  |
| 15 | -2.381603000 | -0.211400000 | -0.910750000 |
| 6  | 0.528276000  | -2.236959000 | -0.977273000 |
| 1  | 1.246797000  | -1.984288000 | -1.760964000 |
| 1  | 0.960776000  | -3.025380000 | -0.351190000 |
| 1  | -0.374809000 | -2.639879000 | -1.445852000 |

**CA7x-H:**

|   |              |              |              |
|---|--------------|--------------|--------------|
| 6 | -1.613627000 | 1.325417000  | -0.314217000 |
| 6 | -2.752222000 | 0.601728000  | 0.290171000  |
| 6 | -2.719872000 | -0.726678000 | 0.516170000  |
| 1 | 0.305786000  | -1.736924000 | -1.528795000 |

|    |              |              |              |
|----|--------------|--------------|--------------|
| 1  | -3.628673000 | 1.198262000  | 0.527462000  |
| 6  | -1.517693000 | -1.589421000 | 0.211868000  |
| 1  | -1.786174000 | -2.646888000 | 0.259636000  |
| 6  | -0.360918000 | 0.507905000  | -0.644020000 |
| 1  | 0.280135000  | 1.131372000  | -1.267115000 |
| 6  | -0.333606000 | -1.260570000 | 1.160176000  |
| 1  | 0.369653000  | -2.095626000 | 1.170791000  |
| 6  | 0.390665000  | 0.025174000  | 0.653578000  |
| 6  | 1.850600000  | -0.308247000 | 0.283365000  |
| 8  | 2.423325000  | -1.352055000 | 0.527212000  |
| 8  | 2.454766000  | 0.732124000  | -0.319374000 |
| 6  | 3.841927000  | 0.545445000  | -0.665368000 |
| 1  | 4.150062000  | 1.476209000  | -1.140474000 |
| 1  | 4.435291000  | 0.357025000  | 0.232411000  |
| 1  | 3.951751000  | -0.293826000 | -1.355999000 |
| 1  | -0.692230000 | -1.122530000 | 2.185860000  |
| 8  | -1.665082000 | 2.528602000  | -0.544593000 |
| 1  | -3.591451000 | -1.213404000 | 0.950151000  |
| 15 | -0.954488000 | -1.066776000 | -1.519115000 |
| 6  | 0.452010000  | 1.127377000  | 1.740537000  |
| 1  | 1.046199000  | 0.786015000  | 2.595472000  |

|   |              |             |             |
|---|--------------|-------------|-------------|
| 1 | 0.901858000  | 2.044398000 | 1.351031000 |
| 1 | -0.552549000 | 1.359410000 | 2.106778000 |

**CA6n-Me:**

|   |              |              |              |
|---|--------------|--------------|--------------|
| 6 | 0.098521000  | 0.806342000  | -1.528374000 |
| 6 | -0.365955000 | 1.924646000  | -0.934689000 |
| 6 | -1.287057000 | 1.885600000  | 0.224451000  |
| 1 | -0.114942000 | 2.911593000  | -1.313447000 |
| 6 | -1.696261000 | 0.502421000  | 0.728742000  |
| 1 | -2.558470000 | 0.629630000  | 1.388451000  |
| 6 | -0.194704000 | -0.586473000 | -1.011591000 |
| 1 | 0.144383000  | -1.335900000 | -1.728959000 |
| 6 | -0.521096000 | -0.207160000 | 1.451346000  |
| 1 | -0.927820000 | -1.010079000 | 2.073231000  |
| 6 | 0.466659000  | -0.800991000 | 0.404348000  |
| 8 | -1.714616000 | 2.913829000  | 0.738132000  |
| 1 | 0.730691000  | 0.893535000  | -2.408709000 |
| 6 | 1.827062000  | -0.083712000 | 0.484992000  |
| 8 | 2.200970000  | 0.633923000  | 1.390539000  |
| 8 | 2.603122000  | -0.393750000 | -0.573185000 |
| 6 | 3.920676000  | 0.191211000  | -0.582472000 |

|    |              |              |              |
|----|--------------|--------------|--------------|
| 1  | 3.852169000  | 1.281614000  | -0.592022000 |
| 1  | 4.485637000  | -0.128977000 | 0.296089000  |
| 1  | 4.393472000  | -0.171005000 | -1.494908000 |
| 1  | -0.000212000 | 0.478782000  | 2.124946000  |
| 15 | -2.085245000 | -0.545174000 | -0.805423000 |
| 6  | 0.767146000  | -2.297352000 | 0.664209000  |
| 1  | 1.500355000  | -2.676849000 | -0.052971000 |
| 1  | 1.171489000  | -2.434176000 | 1.673478000  |
| 1  | -0.138271000 | -2.901146000 | 0.579545000  |
| 6  | -2.625594000 | -2.175771000 | -0.074798000 |
| 1  | -3.718916000 | -2.145752000 | -0.010830000 |
| 1  | -2.362048000 | -2.981993000 | -0.768491000 |
| 1  | -2.231021000 | -2.416254000 | 0.915064000  |

**CA6x-Me:**

|   |             |              |              |
|---|-------------|--------------|--------------|
| 6 | 1.345828000 | -0.991457000 | -1.535437000 |
| 6 | 2.531124000 | -0.962888000 | -0.893519000 |
| 6 | 2.764678000 | -0.122455000 | 0.303051000  |
| 1 | 3.380918000 | -1.538009000 | -1.251246000 |
| 6 | 1.563743000 | 0.671775000  | 0.809442000  |
| 1 | 1.920374000 | 1.385657000  | 1.556181000  |

|    |              |              |              |
|----|--------------|--------------|--------------|
| 6  | 0.125722000  | -0.214604000 | -1.091852000 |
| 1  | -0.624199000 | -0.214338000 | -1.882480000 |
| 6  | 0.477640000  | -0.281611000 | 1.387670000  |
| 1  | -0.111032000 | 0.243677000  | 2.142428000  |
| 6  | -0.458801000 | -0.788520000 | 0.247831000  |
| 8  | 3.861680000  | -0.070965000 | 0.848780000  |
| 1  | 1.247022000  | -1.605246000 | -2.428741000 |
| 6  | -1.904570000 | -0.320110000 | 0.488390000  |
| 8  | -2.381301000 | -0.082760000 | 1.581961000  |
| 8  | -2.626263000 | -0.286824000 | -0.646380000 |
| 6  | -4.022499000 | 0.044699000  | -0.498287000 |
| 1  | -4.432991000 | 0.026823000  | -1.507302000 |
| 1  | -4.522310000 | -0.692455000 | 0.134199000  |
| 1  | -4.131514000 | 1.037356000  | -0.055732000 |
| 1  | 0.951142000  | -1.126009000 | 1.901248000  |
| 15 | 0.817237000  | 1.515848000  | -0.717617000 |
| 6  | -0.565751000 | -2.337118000 | 0.235752000  |
| 1  | -1.004249000 | -2.691620000 | 1.174707000  |
| 1  | -1.195854000 | -2.682818000 | -0.590224000 |
| 1  | 0.424752000  | -2.786922000 | 0.131029000  |
| 6  | -0.589711000 | 2.503049000  | 0.007860000  |

|   |              |             |              |
|---|--------------|-------------|--------------|
| 1 | -1.321813000 | 2.701433000 | -0.782744000 |
| 1 | -1.100936000 | 2.056225000 | 0.863119000  |
| 1 | -0.175212000 | 3.468348000 | 0.319514000  |

**CA7n-Me:**

|   |              |              |              |
|---|--------------|--------------|--------------|
| 6 | 0.143503000  | 1.526232000  | -0.689037000 |
| 6 | -0.069641000 | 2.098057000  | 0.662372000  |
| 6 | -0.907199000 | 1.536509000  | 1.557777000  |
| 1 | 0.443729000  | 3.031374000  | 0.876619000  |
| 6 | -1.667800000 | 0.255628000  | 1.304858000  |
| 1 | -2.487971000 | 0.152438000  | 2.019991000  |
| 6 | -0.430143000 | 0.122920000  | -0.915217000 |
| 1 | -0.266211000 | -0.143362000 | -1.961265000 |
| 6 | -0.719091000 | -0.967568000 | 1.349075000  |
| 1 | -1.313961000 | -1.885436000 | 1.381559000  |
| 6 | 0.173427000  | -0.950276000 | 0.075030000  |
| 6 | 1.632894000  | -0.627746000 | 0.450863000  |
| 8 | 2.098992000  | -0.639549000 | 1.573114000  |
| 8 | 2.370138000  | -0.379025000 | -0.647298000 |
| 6 | 3.764040000  | -0.088319000 | -0.425554000 |
| 1 | 4.180915000  | 0.104391000  | -1.413467000 |

|    |              |              |              |
|----|--------------|--------------|--------------|
| 1  | 3.871553000  | 0.790736000  | 0.214046000  |
| 1  | 4.260964000  | -0.941661000 | 0.042207000  |
| 1  | -0.098200000 | -0.957708000 | 2.248534000  |
| 8  | 0.718025000  | 2.152940000  | -1.570804000 |
| 1  | -1.057480000 | 2.024966000  | 2.518913000  |
| 15 | -2.269526000 | 0.378278000  | -0.489164000 |
| 6  | 0.224927000  | -2.341555000 | -0.607076000 |
| 1  | 0.891802000  | -2.326150000 | -1.473283000 |
| 1  | 0.592215000  | -3.096535000 | 0.097298000  |
| 1  | -0.767649000 | -2.648228000 | -0.943587000 |
| 6  | -3.107555000 | -1.254233000 | -0.824021000 |
| 1  | -4.174022000 | -1.120726000 | -0.612686000 |
| 1  | -3.010872000 | -1.487707000 | -1.890224000 |
| 1  | -2.743336000 | -2.103375000 | -0.241705000 |

**CA7x-Me:**

|   |             |              |              |
|---|-------------|--------------|--------------|
| 6 | 1.654004000 | -1.241115000 | -0.742557000 |
| 6 | 2.767521000 | -0.828553000 | 0.139951000  |
| 6 | 2.729435000 | 0.310653000  | 0.859912000  |
| 1 | 3.633709000 | -1.484267000 | 0.158352000  |
| 6 | 1.547367000 | 1.250682000  | 0.861961000  |



|    |              |              |              |
|----|--------------|--------------|--------------|
| 1  | 1.824760000  | 2.208467000  | 1.309125000  |
| 6  | 0.402234000  | -0.357259000 | -0.736501000 |
| 1  | -0.235983000 | -0.690846000 | -1.554621000 |
| 6  | 0.332567000  | 0.618899000  | 1.591817000  |
| 1  | -0.383781000 | 1.395781000  | 1.866511000  |
| 6  | -0.345351000 | -0.422428000 | 0.648609000  |
| 6  | -1.840654000 | -0.097075000 | 0.481717000  |
| 8  | -2.493370000 | 0.592761000  | 1.242135000  |
| 8  | -2.381760000 | -0.736571000 | -0.569937000 |
| 6  | -3.802146000 | -0.566415000 | -0.753754000 |
| 1  | -4.051779000 | -1.152965000 | -1.637225000 |
| 1  | -4.344885000 | -0.935153000 | 0.119597000  |
| 1  | -4.040806000 | 0.487822000  | -0.911829000 |
| 1  | 0.653178000  | 0.144438000  | 2.525668000  |
| 8  | 1.730130000  | -2.240719000 | -1.449084000 |
| 1  | 3.587156000  | 0.578422000  | 1.474514000  |
| 15 | 1.058928000  | 1.411702000  | -0.963912000 |
| 6  | -0.327208000 | -1.851548000 | 1.258416000  |
| 1  | -0.924074000 | -1.877210000 | 2.176785000  |
| 1  | -0.736674000 | -2.585309000 | 0.558261000  |
| 1  | 0.693600000  | -2.146275000 | 1.516856000  |

|   |              |             |              |
|---|--------------|-------------|--------------|
| 6 | -0.467698000 | 2.481676000 | -0.944068000 |
| 1 | -1.010933000 | 2.324068000 | -1.882730000 |
| 1 | -1.152130000 | 2.322902000 | -0.108455000 |
| 1 | -0.135696000 | 3.525715000 | -0.930056000 |

**EtOH Solvent:**

**1a:**

|    |              |              |              |
|----|--------------|--------------|--------------|
| 6  | -0.371709000 | -1.208717000 | -0.000001000 |
| 6  | -1.336102000 | -0.112765000 | -0.000007000 |
| 6  | -0.798273000 | 1.245699000  | -0.000001000 |
| 6  | 0.527145000  | 1.633563000  | 0.000000000  |
| 6  | 1.652416000  | 0.772145000  | 0.000000000  |
| 1  | 2.253354000  | -1.866527000 | 0.000003000  |
| 1  | -0.728782000 | -2.232340000 | 0.000000000  |
| 1  | -1.556252000 | 2.024857000  | 0.000001000  |
| 1  | 0.738000000  | 2.701123000  | 0.000002000  |
| 1  | 2.671355000  | 1.136028000  | 0.000001000  |
| 8  | -2.567994000 | -0.335640000 | 0.000006000  |
| 15 | 1.275028000  | -0.870504000 | 0.000000000  |

**1b:**

|    |              |              |              |
|----|--------------|--------------|--------------|
| 6  | -0.224513000 | -1.130705000 | -0.008895000 |
| 6  | -1.571355000 | -0.569714000 | 0.002315000  |
| 6  | -1.685092000 | 0.885654000  | 0.010212000  |
| 6  | -0.658219000 | 1.807593000  | 0.008136000  |
| 6  | 0.729193000  | 1.517173000  | 0.000294000  |
| 1  | -0.104964000 | -2.208801000 | -0.018843000 |
| 1  | -2.707035000 | 1.256357000  | 0.017840000  |
| 1  | -0.930077000 | 2.861708000  | 0.013242000  |
| 1  | 1.484780000  | 2.292457000  | -0.004930000 |
| 8  | -2.582882000 | -1.310651000 | 0.009517000  |
| 15 | 1.122883000  | -0.123155000 | -0.032622000 |
| 6  | 2.834821000  | -0.730545000 | 0.034940000  |
| 1  | 3.493817000  | 0.043105000  | -0.365918000 |
| 1  | 3.116018000  | -0.957085000 | 1.066146000  |
| 1  | 2.918267000  | -1.631937000 | -0.576365000 |

**MMA:**

|   |             |             |              |
|---|-------------|-------------|--------------|
| 6 | 1.360030000 | 1.581030000 | -0.000255000 |
| 1 | 0.544125000 | 2.294998000 | -0.000380000 |
| 1 | 2.370045000 | 1.981798000 | -0.000318000 |
| 6 | 1.144102000 | 0.258758000 | -0.000036000 |

|   |              |              |              |
|---|--------------|--------------|--------------|
| 6 | -0.241541000 | -0.300417000 | 0.000043000  |
| 8 | -0.482208000 | -1.496868000 | 0.000177000  |
| 8 | -1.206246000 | 0.641358000  | -0.000055000 |
| 6 | -2.559595000 | 0.152957000  | -0.000029000 |
| 1 | -2.749543000 | -0.449793000 | 0.891639000  |
| 1 | -3.189905000 | 1.041910000  | -0.000473000 |
| 1 | -2.749321000 | -0.450546000 | -0.891229000 |
| 6 | 2.246845000  | -0.767762000 | 0.000143000  |
| 1 | 2.178137000  | -1.418948000 | 0.879158000  |
| 1 | 2.178111000  | -1.419290000 | -0.878615000 |
| 1 | 3.226940000  | -0.283447000 | 0.000037000  |

**TS6n-H:** (Imaginary frequency = 374.20i cm<sup>-1</sup>)

|   |              |              |              |
|---|--------------|--------------|--------------|
| 6 | -0.580889000 | -0.629984000 | 1.790327000  |
| 6 | -1.081628000 | -1.561936000 | 0.888617000  |
| 6 | -1.803218000 | -1.271586000 | -0.339580000 |
| 1 | -1.739258000 | 2.574540000  | 0.202681000  |
| 1 | -0.890353000 | -2.615885000 | 1.069033000  |
| 6 | -2.016365000 | 0.157857000  | -0.663527000 |
| 1 | -2.710135000 | 0.321613000  | -1.486129000 |
| 6 | -0.793641000 | 0.752788000  | 1.712697000  |

|    |              |              |              |
|----|--------------|--------------|--------------|
| 1  | -0.379825000 | 1.410991000  | 2.470210000  |
| 6  | -0.230136000 | 0.570950000  | -1.745591000 |
| 1  | -0.701197000 | 1.370189000  | -2.310652000 |
| 6  | 0.856624000  | 0.893588000  | -0.944197000 |
| 8  | -2.133760000 | -2.167338000 | -1.141980000 |
| 1  | 0.039721000  | -1.003809000 | 2.602697000  |
| 6  | 1.686675000  | -0.219870000 | -0.466634000 |
| 8  | 1.440228000  | -1.406929000 | -0.656381000 |
| 8  | 2.784049000  | 0.197322000  | 0.213454000  |
| 6  | 3.644711000  | -0.842410000 | 0.703834000  |
| 1  | 4.479235000  | -0.330595000 | 1.183505000  |
| 1  | 3.117160000  | -1.469549000 | 1.427818000  |
| 1  | 4.002736000  | -1.468051000 | -0.118034000 |
| 1  | -0.280274000 | -0.418901000 | -2.188611000 |
| 15 | -2.105179000 | 1.302836000  | 0.689361000  |
| 6  | 1.274736000  | 2.319574000  | -0.697672000 |
| 1  | 2.084920000  | 2.608416000  | -1.382900000 |
| 1  | 0.441767000  | 3.006426000  | -0.877892000 |
| 1  | 1.647835000  | 2.473823000  | 0.317485000  |

**TS6x-H:** (Imaginary frequency =  $361.48i$  cm<sup>-1</sup>)

|   |              |              |              |
|---|--------------|--------------|--------------|
| 6 | 1.236886000  | -0.243957000 | 1.921161000  |
| 6 | 2.275327000  | 0.414708000  | 1.274959000  |
| 6 | 2.595028000  | 0.333848000  | -0.141170000 |
| 1 | -0.265095000 | -2.163211000 | -0.924985000 |
| 1 | 2.896695000  | 1.097562000  | 1.848716000  |
| 6 | 1.727610000  | -0.538593000 | -0.966585000 |
| 1 | 2.101218000  | -0.705403000 | -1.975191000 |
| 6 | 0.390539000  | -1.194157000 | 1.327135000  |
| 1 | -0.377076000 | -1.681668000 | 1.919992000  |
| 6 | 0.181028000  | 0.835817000  | -1.514851000 |
| 1 | -0.120113000 | 0.208559000  | -2.346655000 |
| 6 | -0.738538000 | 1.058298000  | -0.500476000 |
| 8 | 3.481448000  | 1.038230000  | -0.665342000 |
| 1 | 1.058763000  | 0.009026000  | 2.964851000  |
| 6 | -1.933452000 | 0.197302000  | -0.490356000 |
| 8 | -2.111340000 | -0.760637000 | -1.240378000 |
| 8 | -2.851189000 | 0.575609000  | 0.429486000  |
| 6 | -4.042340000 | -0.225904000 | 0.492192000  |
| 1 | -4.559967000 | -0.223509000 | -0.470435000 |
| 1 | -3.798952000 | -1.255788000 | 0.767004000  |
| 1 | -4.664020000 | 0.234605000  | 1.260004000  |

|    |              |              |              |
|----|--------------|--------------|--------------|
| 1  | 0.923493000  | 1.599241000  | -1.733458000 |
| 15 | 0.907639000  | -1.901079000 | -0.185850000 |
| 6  | -0.584241000 | 2.202348000  | 0.461291000  |
| 1  | -0.904733000 | 3.146252000  | -0.001709000 |
| 1  | -1.172641000 | 2.060253000  | 1.369005000  |
| 1  | 0.469418000  | 2.326390000  | 0.740693000  |

**TS7n-H:** (Imaginary frequency =  $405.55i$  cm<sup>-1</sup>)

|   |              |              |              |
|---|--------------|--------------|--------------|
| 6 | 0.345945000  | -1.589523000 | -0.590498000 |
| 6 | 0.960909000  | -1.822440000 | 0.724172000  |
| 6 | 1.809295000  | -0.970043000 | 1.378550000  |
| 1 | 2.318540000  | 1.620213000  | -1.356106000 |
| 1 | 0.625070000  | -2.722673000 | 1.232212000  |
| 6 | 2.281963000  | 0.275556000  | 0.834644000  |
| 1 | 3.054422000  | 0.798391000  | 1.393232000  |
| 6 | 0.830970000  | -0.441907000 | -1.337459000 |
| 1 | 0.429524000  | -0.313360000 | -2.339787000 |
| 6 | 0.556001000  | 1.580814000  | 1.244846000  |
| 1 | 1.183622000  | 2.466084000  | 1.217464000  |
| 6 | -0.416801000 | 1.412891000  | 0.267313000  |
| 6 | -1.524271000 | 0.472973000  | 0.568687000  |

|    |              |              |              |
|----|--------------|--------------|--------------|
| 8  | -1.617836000 | -0.194874000 | 1.589330000  |
| 8  | -2.450117000 | 0.438863000  | -0.413787000 |
| 6  | -3.522305000 | -0.502624000 | -0.226877000 |
| 1  | -4.076123000 | -0.281047000 | 0.688887000  |
| 1  | -4.166920000 | -0.385021000 | -1.098192000 |
| 1  | -3.119711000 | -1.516293000 | -0.181363000 |
| 1  | 0.395235000  | 1.137004000  | 2.219815000  |
| 8  | -0.590950000 | -2.310312000 | -0.997350000 |
| 1  | 2.092543000  | -1.210306000 | 2.401417000  |
| 15 | 2.381043000  | 0.274508000  | -0.936615000 |
| 6  | -0.554623000 | 2.390085000  | -0.875463000 |
| 1  | -1.203963000 | 3.225662000  | -0.577294000 |
| 1  | 0.415550000  | 2.822828000  | -1.139454000 |
| 1  | -0.994711000 | 1.936795000  | -1.764652000 |

**TS7x-H:** (Imaginary frequency =  $401.03i$  cm<sup>-1</sup>)

|   |              |              |              |
|---|--------------|--------------|--------------|
| 6 | -1.386961000 | 1.387302000  | -0.706451000 |
| 6 | -2.476329000 | 0.979056000  | 0.194765000  |
| 6 | -2.673363000 | -0.278995000 | 0.691750000  |
| 1 | 0.006567000  | -2.117899000 | -1.291469000 |
| 1 | -3.110114000 | 1.790870000  | 0.542845000  |



|    |              |              |              |
|----|--------------|--------------|--------------|
| 6  | -1.854808000 | -1.417522000 | 0.349423000  |
| 1  | -2.191514000 | -2.388988000 | 0.703370000  |
| 6  | -0.615724000 | 0.328536000  | -1.323959000 |
| 1  | 0.116703000  | 0.628810000  | -2.069426000 |
| 6  | -0.137412000 | -1.164797000 | 1.630813000  |
| 1  | 0.207528000  | -2.172090000 | 1.426720000  |
| 6  | 0.649371000  | -0.098426000 | 1.209321000  |
| 6  | 1.778131000  | -0.421969000 | 0.312093000  |
| 8  | 2.002195000  | -1.529746000 | -0.167713000 |
| 8  | 2.579258000  | 0.644485000  | 0.087025000  |
| 6  | 3.712666000  | 0.409620000  | -0.764951000 |
| 1  | 4.247359000  | 1.358477000  | -0.807563000 |
| 1  | 4.353607000  | -0.371370000 | -0.347965000 |
| 1  | 3.386682000  | 0.112044000  | -1.765225000 |
| 1  | -0.748187000 | -1.042619000 | 2.519554000  |
| 8  | -1.111249000 | 2.596596000  | -0.869392000 |
| 1  | -3.444698000 | -0.423923000 | 1.445525000  |
| 15 | -1.163672000 | -1.328939000 | -1.281182000 |
| 6  | 0.549890000  | 1.273985000  | 1.821873000  |
| 1  | 0.489594000  | 2.067198000  | 1.069718000  |
| 1  | -0.329457000 | 1.342240000  | 2.468090000  |

1 1.436610000 1.479906000 2.436128000

**TS6n-Me:** (Imaginary frequency = 406.00i cm<sup>-1</sup>)

6 0.293396000 0.901681000 1.820958000

6 0.357875000 1.924958000 0.887070000

6 1.053145000 1.869955000 -0.386832000

1 -0.169801000 2.852833000 1.085703000

6 1.693332000 0.573073000 -0.755042000

1 2.366638000 0.670240000 -1.606038000

6 0.986077000 -0.319742000 1.730573000

1 0.897183000 -1.050941000 2.528628000

6 0.187286000 -0.374442000 -1.708505000

1 0.817812000 -1.042198000 -2.290725000

6 -0.803794000 -0.972921000 -0.920456000

8 1.031949000 2.813548000 -1.199482000

1 -0.344533000 1.054920000 2.689591000

6 -1.871169000 -0.106636000 -0.426992000

8 -1.937323000 1.106789000 -0.613060000

8 -2.815166000 -0.784534000 0.280617000

6 -3.901485000 0.006145000 0.783624000

1 -4.561394000 -0.693690000 1.297202000

|    |              |              |              |
|----|--------------|--------------|--------------|
| 1  | -3.537593000 | 0.765314000  | 1.481598000  |
| 1  | -4.434502000 | 0.499600000  | -0.033918000 |
| 1  | -0.064572000 | 0.562580000  | -2.200810000 |
| 15 | 2.299566000  | -0.409580000 | 0.592692000  |
| 6  | -0.907217000 | -2.463949000 | -0.715415000 |
| 1  | -1.855427000 | -2.837871000 | -1.123550000 |
| 1  | -0.097943000 | -2.989665000 | -1.230127000 |
| 1  | -0.892888000 | -2.752494000 | 0.340667000  |
| 6  | 2.702891000  | -2.131228000 | 0.094050000  |
| 1  | 1.869630000  | -2.613882000 | -0.419003000 |
| 1  | 3.575721000  | -2.107546000 | -0.563604000 |
| 1  | 2.960482000  | -2.701294000 | 0.991215000  |

**TS6x-Me:** (Imaginary frequency =  $392.40i \text{ cm}^{-1}$ )

|   |              |              |              |
|---|--------------|--------------|--------------|
| 6 | -1.195629000 | -0.280472000 | 2.045431000  |
| 6 | -1.960644000 | -1.139521000 | 1.262660000  |
| 6 | -2.305963000 | -0.939889000 | -0.135206000 |
| 1 | -2.347114000 | -2.052533000 | 1.707722000  |
| 6 | -1.746552000 | 0.268729000  | -0.816847000 |
| 1 | -2.272945000 | 0.500265000  | -1.742370000 |
| 6 | -0.721174000 | 0.977186000  | 1.640346000  |

|    |              |              |              |
|----|--------------|--------------|--------------|
| 1  | -0.147673000 | 1.588799000  | 2.330138000  |
| 6  | -0.094641000 | -0.425777000 | -1.660279000 |
| 1  | 0.190202000  | 0.470406000  | -2.203653000 |
| 6  | 0.858721000  | -0.970411000 | -0.790278000 |
| 8  | -2.942003000 | -1.786880000 | -0.791356000 |
| 1  | -0.946495000 | -0.612051000 | 3.051898000  |
| 6  | 2.030959000  | -0.153790000 | -0.441755000 |
| 8  | 2.258504000  | 0.983142000  | -0.849982000 |
| 8  | 2.900489000  | -0.805562000 | 0.370846000  |
| 6  | 4.082414000  | -0.076355000 | 0.734454000  |
| 1  | 4.664060000  | 0.185298000  | -0.153441000 |
| 1  | 3.821145000  | 0.838265000  | 1.273688000  |
| 1  | 4.652878000  | -0.746439000 | 1.377913000  |
| 1  | -0.693306000 | -1.136929000 | -2.229168000 |
| 15 | -1.428067000 | 1.678426000  | 0.216417000  |
| 6  | 0.675921000  | -2.346062000 | -0.242016000 |
| 1  | 0.284339000  | -3.028111000 | -1.005604000 |
| 1  | 1.596959000  | -2.757049000 | 0.172955000  |
| 1  | -0.081985000 | -2.333477000 | 0.566535000  |
| 6  | -0.372483000 | 2.946199000  | -0.593882000 |
| 1  | -0.204018000 | 3.759504000  | 0.117797000  |

|   |              |             |              |
|---|--------------|-------------|--------------|
| 1 | 0.580544000  | 2.517367000 | -0.908827000 |
| 1 | -0.917062000 | 3.345666000 | -1.453657000 |

**TS7n-Me:** (Imaginary frequency =  $447.18i$  cm<sup>-1</sup>)

|   |              |              |              |
|---|--------------|--------------|--------------|
| 6 | -0.064300000 | -1.545833000 | -0.868795000 |
| 6 | 0.129202000  | -2.108472000 | 0.476767000  |
| 6 | 0.956405000  | -1.603203000 | 1.434049000  |
| 1 | -0.514624000 | -2.949484000 | 0.719690000  |
| 6 | 1.807675000  | -0.440562000 | 1.246477000  |
| 1 | 2.532061000  | -0.248842000 | 2.036046000  |
| 6 | 0.865707000  | -0.504387000 | -1.282777000 |
| 1 | 0.775820000  | -0.161946000 | -2.311376000 |
| 6 | 0.482550000  | 1.145227000  | 1.523611000  |
| 1 | 1.249625000  | 1.902823000  | 1.661738000  |
| 6 | -0.417520000 | 1.303752000  | 0.463383000  |
| 6 | -1.703003000 | 0.579826000  | 0.567842000  |
| 8 | -2.028016000 | -0.161597000 | 1.487064000  |
| 8 | -2.519058000 | 0.835854000  | -0.481102000 |
| 6 | -3.760966000 | 0.112479000  | -0.493728000 |
| 1 | -4.343417000 | 0.323837000  | 0.406595000  |
| 1 | -4.292167000 | 0.459919000  | -1.380223000 |

|    |              |              |              |
|----|--------------|--------------|--------------|
| 1  | -3.564448000 | -0.959787000 | -0.562435000 |
| 1  | 0.100862000  | 0.706813000  | 2.439317000  |
| 8  | -1.010452000 | -1.923838000 | -1.592027000 |
| 1  | 0.930411000  | -2.045383000 | 2.427904000  |
| 15 | 2.368287000  | -0.293477000 | -0.428128000 |
| 6  | -0.318391000 | 2.439330000  | -0.532218000 |
| 1  | -1.044482000 | 3.222647000  | -0.271770000 |
| 1  | 0.671677000  | 2.899356000  | -0.515953000 |
| 1  | -0.542144000 | 2.131267000  | -1.555325000 |
| 6  | 3.175154000  | 1.322559000  | -0.772510000 |
| 1  | 4.183934000  | 1.302245000  | -0.351882000 |
| 1  | 3.253793000  | 1.447700000  | -1.856187000 |
| 1  | 2.623918000  | 2.163341000  | -0.348291000 |

**TS7x-Me:** (Imaginary frequency =  $441.13i \text{ cm}^{-1}$ )

|   |             |              |              |
|---|-------------|--------------|--------------|
| 6 | 1.014176000 | -1.387630000 | -1.151984000 |
| 6 | 2.037224000 | -1.683176000 | -0.133334000 |
| 6 | 2.480426000 | -0.810033000 | 0.811248000  |
| 1 | 2.386013000 | -2.712594000 | -0.118447000 |
| 6 | 2.013914000 | 0.566686000  | 0.924204000  |
| 1 | 2.567533000 | 1.197977000  | 1.617152000  |

|    |              |              |              |
|----|--------------|--------------|--------------|
| 6  | 0.665977000  | 0.007684000  | -1.360804000 |
| 1  | 0.011195000  | 0.225841000  | -2.201200000 |
| 6  | 0.221883000  | 0.396776000  | 1.900977000  |
| 1  | 0.029769000  | 1.461056000  | 1.996540000  |
| 6  | -0.715583000 | -0.369832000 | 1.198529000  |
| 6  | -1.788702000 | 0.333959000  | 0.468035000  |
| 8  | -1.931545000 | 1.549690000  | 0.379507000  |
| 8  | -2.680692000 | -0.531711000 | -0.074557000 |
| 6  | -3.775892000 | 0.064021000  | -0.786964000 |
| 1  | -4.384298000 | -0.769611000 | -1.138179000 |
| 1  | -4.360406000 | 0.711437000  | -0.128038000 |
| 1  | -3.410750000 | 0.651158000  | -1.634102000 |
| 1  | 0.688560000  | -0.058428000 | 2.770559000  |
| 8  | 0.448152000  | -2.313492000 | -1.772309000 |
| 1  | 3.163298000  | -1.169745000 | 1.578284000  |
| 15 | 1.635156000  | 1.263051000  | -0.658165000 |
| 6  | -0.832709000 | -1.859153000 | 1.392172000  |
| 1  | -0.842917000 | -2.403554000 | 0.440751000  |
| 1  | -0.006060000 | -2.236304000 | 1.999534000  |
| 1  | -1.771777000 | -2.105169000 | 1.906503000  |
| 6  | 0.803834000  | 2.899002000  | -0.562699000 |

|   |              |             |              |
|---|--------------|-------------|--------------|
| 1 | -0.128371000 | 2.832577000 | -0.000104000 |
| 1 | 1.496398000  | 3.602630000 | -0.092791000 |
| 1 | 0.599876000  | 3.241247000 | -1.581382000 |

**CA6n-H:**

|   |              |              |              |
|---|--------------|--------------|--------------|
| 6 | 0.278293000  | -0.706298000 | -1.493999000 |
| 6 | 1.086144000  | -1.602084000 | -0.891409000 |
| 6 | 1.977190000  | -1.237648000 | 0.233077000  |
| 1 | 1.701330000  | 2.547727000  | -0.157619000 |
| 1 | 1.138499000  | -2.632779000 | -1.231118000 |
| 6 | 1.926889000  | 0.213348000  | 0.706901000  |
| 1 | 2.786896000  | 0.385913000  | 1.357878000  |
| 6 | 0.149550000  | 0.732663000  | -1.042943000 |
| 1 | -0.402650000 | 1.313631000  | -1.782863000 |
| 6 | 0.587285000  | 0.524508000  | 1.426932000  |
| 1 | 0.740595000  | 1.400736000  | 2.063944000  |
| 6 | -0.525062000 | 0.828551000  | 0.378012000  |
| 8 | 2.718782000  | -2.062525000 | 0.757002000  |
| 1 | -0.332433000 | -1.022589000 | -2.336107000 |
| 6 | -1.682699000 | -0.175761000 | 0.498682000  |
| 8 | -1.887920000 | -0.913510000 | 1.442007000  |



|    |              |              |              |
|----|--------------|--------------|--------------|
| 8  | -2.497576000 | -0.106316000 | -0.571473000 |
| 6  | -3.651863000 | -0.970905000 | -0.547671000 |
| 1  | -3.341591000 | -2.017232000 | -0.498337000 |
| 1  | -4.283925000 | -0.736949000 | 0.312045000  |
| 1  | -4.182360000 | -0.772585000 | -1.478334000 |
| 1  | 0.286045000  | -0.297967000 | 2.081771000  |
| 15 | 1.939162000  | 1.315599000  | -0.834991000 |
| 6  | -1.142794000 | 2.230011000  | 0.598382000  |
| 1  | -1.929951000 | 2.432210000  | -0.133484000 |
| 1  | -1.576192000 | 2.301500000  | 1.601936000  |
| 1  | -0.375589000 | 3.004895000  | 0.509067000  |

**CA6x-H:**

|   |              |              |              |
|---|--------------|--------------|--------------|
| 6 | -1.286066000 | 1.224077000  | -1.266388000 |
| 6 | -2.479471000 | 1.031917000  | -0.669470000 |
| 6 | -2.724883000 | -0.085660000 | 0.270073000  |
| 1 | 0.415413000  | -2.081115000 | -0.529274000 |
| 1 | -3.323970000 | 1.684051000  | -0.874853000 |
| 6 | -1.524112000 | -0.970699000 | 0.590576000  |
| 1 | -1.879467000 | -1.844638000 | 1.140663000  |
| 6 | -0.073845000 | 0.350548000  | -1.034299000 |

|    |              |              |              |
|----|--------------|--------------|--------------|
| 1  | 0.677199000  | 0.540187000  | -1.800492000 |
| 6  | -0.452033000 | -0.169927000 | 1.385991000  |
| 1  | 0.109305000  | -0.854987000 | 2.024428000  |
| 6  | 0.525290000  | 0.544052000  | 0.405478000  |
| 8  | -3.828915000 | -0.276402000 | 0.769192000  |
| 1  | -1.172320000 | 2.053981000  | -1.960838000 |
| 6  | 1.922188000  | -0.103123000 | 0.481366000  |
| 8  | 2.321523000  | -0.813657000 | 1.383474000  |
| 8  | 2.694464000  | 0.265225000  | -0.556322000 |
| 6  | 4.049156000  | -0.230494000 | -0.547982000 |
| 1  | 4.509796000  | 0.169450000  | -1.450538000 |
| 1  | 4.576230000  | 0.122158000  | 0.341437000  |
| 1  | 4.053848000  | -1.322707000 | -0.565934000 |
| 1  | -0.934358000 | 0.559726000  | 2.045923000  |
| 15 | -0.730319000 | -1.426184000 | -1.071250000 |
| 6  | 0.727406000  | 2.034848000  | 0.771505000  |
| 1  | 1.170149000  | 2.124852000  | 1.769576000  |
| 1  | 1.389110000  | 2.532193000  | 0.056131000  |
| 1  | -0.234497000 | 2.555055000  | 0.780665000  |

**CA7n-H:**

|   |              |              |              |
|---|--------------|--------------|--------------|
| 6 | -0.326109000 | 1.524515000  | -0.477674000 |
| 6 | -0.925741000 | 1.810350000  | 0.844289000  |
| 6 | -1.725550000 | 0.929669000  | 1.478744000  |
| 1 | -2.365629000 | -1.583376000 | -1.292465000 |
| 1 | -0.719431000 | 2.791428000  | 1.262888000  |
| 6 | -2.050239000 | -0.442898000 | 0.938991000  |
| 1 | -2.907839000 | -0.866505000 | 1.466089000  |
| 6 | -0.512356000 | 0.102996000  | -1.019456000 |
| 1 | -0.136118000 | 0.081647000  | -2.043520000 |
| 6 | -0.819032000 | -1.380767000 | 1.013320000  |
| 1 | -1.156278000 | -2.413028000 | 0.877727000  |
| 6 | 0.179407000  | -0.997086000 | -0.120075000 |
| 6 | 1.503468000  | -0.474892000 | 0.465831000  |
| 8 | 1.815572000  | -0.477937000 | 1.640716000  |
| 8 | 2.314790000  | -0.023965000 | -0.507995000 |
| 6 | 3.593367000  | 0.490475000  | -0.084841000 |
| 1 | 4.098625000  | 0.799747000  | -0.999102000 |
| 1 | 3.456045000  | 1.343125000  | 0.584191000  |
| 1 | 4.166012000  | -0.286638000 | 0.426567000  |
| 1 | -0.331225000 | -1.320464000 | 1.989417000  |
| 8 | 0.277774000  | 2.384479000  | -1.109589000 |

|    |              |              |              |
|----|--------------|--------------|--------------|
| 1  | -2.161472000 | 1.205440000  | 2.437081000  |
| 15 | -2.382018000 | -0.210465000 | -0.909068000 |
| 6  | 0.530120000  | -2.232586000 | -0.984830000 |
| 1  | 1.247640000  | -1.976578000 | -1.768360000 |
| 1  | 0.963803000  | -3.022403000 | -0.361480000 |
| 1  | -0.372968000 | -2.634699000 | -1.453860000 |

**CA7x-H:**

|   |              |              |              |
|---|--------------|--------------|--------------|
| 6 | -1.611368000 | 1.326569000  | -0.313902000 |
| 6 | -2.749798000 | 0.605926000  | 0.292401000  |
| 6 | -2.719735000 | -0.722848000 | 0.518422000  |
| 1 | 0.300573000  | -1.738104000 | -1.533317000 |
| 1 | -3.624738000 | 1.203607000  | 0.532414000  |
| 6 | -1.520621000 | -1.588442000 | 0.211272000  |
| 1 | -1.791718000 | -2.645083000 | 0.258593000  |
| 6 | -0.360356000 | 0.507514000  | -0.644066000 |
| 1 | 0.281951000  | 1.129026000  | -1.267848000 |
| 6 | -0.334345000 | -1.263247000 | 1.158126000  |
| 1 | 0.367023000  | -2.099862000 | 1.164998000  |
| 6 | 0.390906000  | 0.022603000  | 0.653357000  |
| 6 | 1.850743000  | -0.309941000 | 0.281801000  |

|    |              |              |              |
|----|--------------|--------------|--------------|
| 8  | 2.422123000  | -1.356452000 | 0.519152000  |
| 8  | 2.456016000  | 0.732934000  | -0.313939000 |
| 6  | 3.843212000  | 0.547663000  | -0.662719000 |
| 1  | 4.151765000  | 1.481731000  | -1.130806000 |
| 1  | 4.436929000  | 0.352363000  | 0.233260000  |
| 1  | 3.951088000  | -0.285865000 | -1.360460000 |
| 1  | -0.690829000 | -1.127455000 | 2.184717000  |
| 8  | -1.661352000 | 2.530262000  | -0.546668000 |
| 1  | -3.591054000 | -1.207428000 | 0.954999000  |
| 15 | -0.957825000 | -1.065602000 | -1.519136000 |
| 6  | 0.452262000  | 1.122972000  | 1.742246000  |
| 1  | 1.046250000  | 0.780004000  | 2.596564000  |
| 1  | 0.902763000  | 2.040630000  | 1.354864000  |
| 1  | -0.552315000 | 1.353909000  | 2.109090000  |

**CA6n-Me:**

|   |              |             |              |
|---|--------------|-------------|--------------|
| 6 | 0.100501000  | 0.802291000 | -1.529799000 |
| 6 | -0.361609000 | 1.922664000 | -0.937296000 |
| 6 | -1.281487000 | 1.886669000 | 0.221993000  |
| 1 | -0.107859000 | 2.908231000 | -1.317968000 |
| 6 | -1.695605000 | 0.506220000 | 0.727673000  |

|    |              |              |              |
|----|--------------|--------------|--------------|
| 1  | -2.558044000 | 0.635505000  | 1.386670000  |
| 6  | -0.195469000 | -0.588718000 | -1.010840000 |
| 1  | 0.141709000  | -1.340449000 | -1.726457000 |
| 6  | -0.522978000 | -0.206129000 | 1.451848000  |
| 1  | -0.933047000 | -1.008097000 | 2.072481000  |
| 6  | 0.464970000  | -0.801655000 | 0.406303000  |
| 8  | -1.704603000 | 2.917618000  | 0.736426000  |
| 1  | 0.732682000  | 0.887399000  | -2.410269000 |
| 6  | 1.825424000  | -0.084184000 | 0.485054000  |
| 8  | 2.197053000  | 0.640757000  | 1.386729000  |
| 8  | 2.602578000  | -0.400341000 | -0.568877000 |
| 6  | 3.920820000  | 0.184141000  | -0.582827000 |
| 1  | 3.852421000  | 1.274406000  | -0.599070000 |
| 1  | 4.486433000  | -0.132317000 | 0.296591000  |
| 1  | 4.392193000  | -0.183337000 | -1.493707000 |
| 1  | -0.002052000 | 0.478491000  | 2.126739000  |
| 15 | -2.085530000 | -0.543600000 | -0.804804000 |
| 6  | 0.764044000  | -2.297919000 | 0.668252000  |
| 1  | 1.495868000  | -2.679428000 | -0.049125000 |
| 1  | 1.168953000  | -2.433497000 | 1.677423000  |
| 1  | -0.142345000 | -2.900380000 | 0.585412000  |

|   |              |              |              |
|---|--------------|--------------|--------------|
| 6 | -2.631009000 | -2.171464000 | -0.074790000 |
| 1 | -3.724164000 | -2.137910000 | -0.010396000 |
| 1 | -2.369079000 | -2.977833000 | -0.768778000 |
| 1 | -2.236558000 | -2.412551000 | 0.914857000  |

**CA6x-Me:**

|   |              |              |              |
|---|--------------|--------------|--------------|
| 6 | 1.346353000  | -0.990882000 | -1.535063000 |
| 6 | 2.531997000  | -0.961270000 | -0.893230000 |
| 6 | 2.764672000  | -0.120381000 | 0.302193000  |
| 1 | 3.381454000  | -1.536638000 | -1.251405000 |
| 6 | 1.563141000  | 0.670304000  | 0.810912000  |
| 1 | 1.917794000  | 1.384155000  | 1.558611000  |
| 6 | 0.125816000  | -0.214864000 | -1.091940000 |
| 1 | -0.623362000 | -0.214350000 | -1.883117000 |
| 6 | 0.477846000  | -0.285216000 | 1.387433000  |
| 1 | -0.110142000 | 0.239352000  | 2.143171000  |
| 6 | -0.458747000 | -0.790486000 | 0.246988000  |
| 8 | 3.863651000  | -0.064196000 | 0.845603000  |
| 1 | 1.247710000  | -1.605536000 | -2.427634000 |
| 6 | -1.904624000 | -0.322589000 | 0.488087000  |
| 8 | -2.381966000 | -0.092610000 | 1.583664000  |

|    |              |              |              |
|----|--------------|--------------|--------------|
| 8  | -2.624159000 | -0.280930000 | -0.646256000 |
| 6  | -4.020990000 | 0.051211000  | -0.500317000 |
| 1  | -4.428193000 | 0.039757000  | -1.510607000 |
| 1  | -4.523067000 | -0.689798000 | 0.125726000  |
| 1  | -4.129752000 | 1.041618000  | -0.052895000 |
| 1  | 0.951752000  | -1.130311000 | 1.899348000  |
| 15 | 0.814974000  | 1.515341000  | -0.714883000 |
| 6  | -0.565731000 | -2.339122000 | 0.232274000  |
| 1  | -1.004868000 | -2.695129000 | 1.170338000  |
| 1  | -1.195156000 | -2.683202000 | -0.594788000 |
| 1  | 0.424817000  | -2.788772000 | 0.127518000  |
| 6  | -0.591506000 | 2.501771000  | 0.010384000  |
| 1  | -1.324129000 | 2.699216000  | -0.779832000 |
| 1  | -1.101611000 | 2.053601000  | 0.865574000  |
| 1  | -0.177433000 | 3.466932000  | 0.322816000  |

**CA7n-Me:**

|   |              |             |              |
|---|--------------|-------------|--------------|
| 6 | 0.139262000  | 1.528817000 | -0.685156000 |
| 6 | -0.071116000 | 2.095867000 | 0.668008000  |
| 6 | -0.907813000 | 1.530942000 | 1.562678000  |
| 1 | 0.441133000  | 3.029250000 | 0.884906000  |



|    |              |              |              |
|----|--------------|--------------|--------------|
| 6  | -1.667433000 | 0.250544000  | 1.306737000  |
| 1  | -2.486945000 | 0.144204000  | 2.021825000  |
| 6  | -0.430135000 | 0.125293000  | -0.914708000 |
| 1  | -0.267909000 | -0.139032000 | -1.961540000 |
| 6  | -0.717185000 | -0.971667000 | 1.346656000  |
| 1  | -1.311099000 | -1.890046000 | 1.376305000  |
| 6  | 0.175275000  | -0.949458000 | 0.072625000  |
| 6  | 1.634586000  | -0.627250000 | 0.448243000  |
| 8  | 2.102842000  | -0.648553000 | 1.569904000  |
| 8  | 2.370502000  | -0.368170000 | -0.648175000 |
| 6  | 3.766855000  | -0.086127000 | -0.426658000 |
| 1  | 4.182985000  | 0.112482000  | -1.413669000 |
| 1  | 3.880118000  | 0.787075000  | 0.219898000  |
| 1  | 4.260186000  | -0.946227000 | 0.032155000  |
| 1  | -0.097030000 | -0.964094000 | 2.246589000  |
| 8  | 0.707756000  | 2.161725000  | -1.567778000 |
| 1  | -1.058087000 | 2.016743000  | 2.525094000  |
| 15 | -2.269975000 | 0.376014000  | -0.486426000 |
| 6  | 0.227945000  | -2.338987000 | -0.613403000 |
| 1  | 0.894758000  | -2.320902000 | -1.479617000 |
| 1  | 0.595445000  | -3.095440000 | 0.089120000  |

|   |              |              |              |
|---|--------------|--------------|--------------|
| 1 | -0.764489000 | -2.644990000 | -0.950659000 |
| 6 | -3.107294000 | -1.254413000 | -0.826873000 |
| 1 | -4.173654000 | -1.121319000 | -0.615071000 |
| 1 | -3.009387000 | -1.485000000 | -1.893504000 |
| 1 | -2.742900000 | -2.104300000 | -0.245938000 |

**CA7x-Me:**

|   |              |              |              |
|---|--------------|--------------|--------------|
| 6 | 1.651499000  | -1.242411000 | -0.742484000 |
| 6 | 2.764660000  | -0.833443000 | 0.140776000  |
| 6 | 2.728692000  | 0.306109000  | 0.860933000  |
| 1 | 3.629249000  | -1.491236000 | 0.161411000  |
| 6 | 1.549762000  | 1.249585000  | 0.861524000  |
| 1 | 1.829485000  | 2.206801000  | 1.308003000  |
| 6 | 0.401301000  | -0.357477000 | -0.735990000 |
| 1 | -0.238221000 | -0.688877000 | -1.553988000 |
| 6 | 0.332853000  | 0.621613000  | 1.591262000  |
| 1 | -0.381401000 | 1.401454000  | 1.862824000  |
| 6 | -0.346011000 | -0.420480000 | 0.649666000  |
| 6 | -1.841287000 | -0.095384000 | 0.481594000  |
| 8 | -2.493870000 | 0.596515000  | 1.240887000  |
| 8 | -2.382143000 | -0.737087000 | -0.567900000 |

|    |              |              |              |
|----|--------------|--------------|--------------|
| 6  | -3.802788000 | -0.566993000 | -0.754383000 |
| 1  | -4.051114000 | -1.155378000 | -1.636873000 |
| 1  | -4.346570000 | -0.934296000 | 0.118836000  |
| 1  | -4.040310000 | 0.486874000  | -0.915816000 |
| 1  | 0.651463000  | 0.149017000  | 2.526614000  |
| 8  | 1.726822000  | -2.241051000 | -1.452108000 |
| 1  | 3.585997000  | 0.570950000  | 1.477154000  |
| 15 | 1.061136000  | 1.410297000  | -0.963755000 |
| 6  | -0.328223000 | -1.848725000 | 1.261704000  |
| 1  | -0.924891000 | -1.872803000 | 2.180155000  |
| 1  | -0.738643000 | -2.583567000 | 0.563157000  |
| 1  | 0.692468000  | -2.143101000 | 1.520925000  |
| 6  | -0.462293000 | 2.483353000  | -0.946919000 |
| 1  | -1.004875000 | 2.326588000  | -1.885999000 |
| 1  | -1.147373000 | 2.325125000  | -0.111791000 |
| 1  | -0.127766000 | 3.526489000  | -0.931411000 |
